1 **Suppression of DSB Formation by Pol $\beta$  in Active DNA**  
2 **Demethylation is Required for Postnatal Hippocampal**  
3 **Development**

4  
5 **Akiko Uyeda,<sup>1</sup> Kohei Onishi,<sup>1</sup> Teruyoshi Hirayama,<sup>1,2</sup> Satoko Hattori,<sup>3</sup>**  
6 **Tsuyoshi Miyakawa,<sup>3</sup> Takeshi Yagi,<sup>1,2</sup> Nobuhiko Yamamoto<sup>1</sup> and**  
7 **Noriyuki Sugo<sup>1,\*</sup>**

- 8  
9 1. Graduate School of Frontier Biosciences, Osaka University, Suita, Osaka, 565-0871,  
10 Japan.  
11 2. AMED-CREST, Japan Agency for Medical Research and Development (AMED),  
12 Suita, Osaka, 565-0871, Japan  
13 3. Institute for Comprehensive Medical Science, Fujita Health University, Toyoake,  
14 Aichi, 470-1192, Japan.

15  
16  
17 **Contact Info**

18 \*Correspondence: [sugo@fbs.osaka-u.ac.jp](mailto:sugo@fbs.osaka-u.ac.jp)

19

20

21 Number of pages: 51 pages

22 Number of figures and tables: 6 figures, 4 supplemental figures, 1 supplemental table

23 Number of words for whole manuscript: 38868 words /Abstract: words 147

24

1    **Abstract**

2    Genome stability is essential for brain development and function. However, the  
3    contribution of DNA repair to genome stability in neurons remains elusive. Here, we  
4    demonstrate that the base excision repair protein Pol $\beta$  is involved in hippocampal  
5    neuronal differentiation via a TET-mediated active DNA demethylation during early  
6    postnatal stages. Pol $\beta$  deficiency induced extensive DNA double-strand breaks (DSBs) in  
7    hippocampal neurons, and a lesser extent in cortical neurons, during a period in which  
8    decreased levels of 5-methylcytosine were observed in genomic DNA. Inhibition of the  
9    hydroxylation of 5-methylcytosine by microRNAs miR29a/b-1 expression diminished  
10   DSB formation. Conversely, its induction by TET1 overexpression increased DSBs. The  
11   damaged hippocampal neurons exhibited aberrant neuronal gene expression profiles and  
12   dendrite formation. Behavioral analyses revealed impaired spatial learning and memory  
13   in adulthood. Thus, Pol $\beta$  maintains genome stability in the active DNA demethylation  
14   that occurs during postnatal neuronal development, thereby contributing to differentiation  
15   and subsequent behavior.

16

17    **Keywords**

18    DNA repair, DNA demethylation, DNA double-strand break, hippocampal development,  
19    learning and memory, neuronal differentiation.

## 1 **Introduction**

2 Genome stability is crucial for both genetic and epigenetic regulation underlying gene  
3 expression in the brain throughout life. DNA repair is essential to maintain genome  
4 stability and has been well characterized through studies on cancer and immune cell  
5 differentiation in mammals (Alt et al, 2013; Lindahl & Wood, 1999). In the nervous  
6 system, mouse models reveal that DNA repair dysfunction in neural progenitors  
7 frequently leads to genome instability and neuronal apoptosis during the period of  
8 neurogenesis (Deans et al, 2000; Gao et al, 1998; Gu et al, 2000; Lee et al, 2001; Lee et  
9 al, 2009; Pulvers & Huttner, 2009; Sugo et al, 2000). In addition, genetic diseases related  
10 to DNA repair defects include microcephaly, developmental disorders, and psychiatric  
11 disorders (Madabhushi et al, 2014; McKinnon, 2013). Accumulation of somatic  
12 mutations in neurons during development has been implicated in developmental brain  
13 disorders such as autism and schizophrenia (McConnell et al, 2017; McKinnon, 2013;  
14 Poduri et al, 2013). These studies suggest that DNA repair is likely to be critical for  
15 normal brain development and function. However, while DNA repair has been  
16 characterized in mitotic cells including neural progenitors, its role in neurons as  
17 postmitotic cells remains unclear. In brain development, postnatal neuronal  
18 differentiation is also a core process for circuit formation and activity-dependent  
19 refinement (Flavell & Greenberg, 2008; Kolodkin & Tessier-Lavigne, 2011). Thus, it is  
20 important to uncover novel aspects of DNA repair in neuronal differentiation and function.

21         Base excision repair (BER) is mainly involved in the removal of DNA base  
22 damage and apurinic/aprimidinic sites (Wilson et al, 2000). In addition, recent studies  
23 have revealed that BER also plays a role in the active DNA demethylation process as an  
24 epigenetic regulation (Schuermann et al, 2016; Wu & Zhang, 2010). In this process, 5-  
25 methylcytosine (5mC) is initially oxidized by TET enzymes and is converted to 5-  
26 hydroxymethylcytosine (5hmC) (Ito et al, 2010; Ito et al, 2011; Tahiliani et al, 2009); the  
27 modified base is finally recognized by thymine DNA glycosylase and replaced with  
28 cytosine by DNA polymerase  $\beta$  (Pol $\beta$ ) and the Xrcc1/Lig3 complex (Cortellino et al, 2011,

1 Cortázar et al, 2011, He et al, 2011, Weber et al, 2016). DNA methylation and  
2 demethylation often play a central role in cell differentiation (Moore et al, 2013; Wu &  
3 Zhang, 2017). In the neuronal epigenome, dynamic changes in the DNA methylation level  
4 are observed during brain development (Lister, 2013; Sharma, 2016; Simmons et al,  
5 2013) and affect neuronal gene expression, which is implicated in neurogenesis,  
6 maturation, and plasticity (Feng et al, 2010; Moretti, et al, 2006; Sanosaka et al, 2017).  
7 This regulation also contributes to learning and memory (Gontier et al, 2018; Kaas et al,  
8 2013; Li et al, 2014; Rudenko et al, 2013).

9 Studies using conventional *Polβ*-deficient mice show increased neuronal  
10 apoptosis during the period of neurogenesis in the developing nervous system rather than  
11 in other tissues, and the mice die just after birth (Sugo et al, 2000). The p53-dependent  
12 pathway regulates neuronal apoptosis after the final mitosis (Sugo et al, 2007; Sugo et al,  
13 2004). Our previous study focusing on spatiotemporal roles using forebrain-specific  
14 conditional knockout *Emx1-Cre/Polβ<sup>fl/fl</sup>* and *Nex-Cre/Polβ<sup>fl/fl</sup>* mice indicates that *Polβ*  
15 deficiency in neural progenitors rather than in postmitotic neurons specifically leads to  
16 an increase of DNA double-strand breaks (DSBs) associated with replication in the  
17 embryonic cortex (Onishi et al, 2017). The accumulation of DSBs frequently induces  
18 neuronal apoptosis and abnormal axon projection. Furthermore, impairment of the DNA  
19 demethylation process is a potential cause of DSBs in *Polβ*-deficient progenitors,  
20 suggesting that epigenetic regulation via BER including *Polβ* in neural progenitors is  
21 essential for neuronal survival and differentiation. However, how *Polβ* contributes to  
22 subsequent neuronal development, gene expression, and further cognitive function is not  
23 fully understood.

24 To address this issue, we investigated the role of *Polβ* using *Nex-Cre/Polβ<sup>fl/fl</sup>*  
25 mice, in which postmitotic excitatory neurons lack *Polβ* expression. We found that the  
26 mutant mice exhibited extensive DSB formation, but not apoptosis, in hippocampal  
27 neurons more so than in cortical neurons during early postnatal stages, in which the levels  
28 of 5mC and 5hmC in the genome decreased. *In vivo* manipulation of active DNA

1 demethylation during this period altered the extent of DSBs in Pol $\beta$ -deficient neurons.  
2 Furthermore, Pol $\beta$  deficiency affected gene expression profiles and dendritic morphology  
3 of developing hippocampal neurons, and impaired hippocampus-related learning and  
4 memory. These findings suggest that genome stability mediated by Pol $\beta$  is required for  
5 active DNA demethylation leading to normal postnatal neuronal development and  
6 memory function.

7

8

## 1 **Results**

### 2 **Pol $\beta$ -deficient neurons show accumulation of DNA double-strand breaks in** 3 **postnatal development**

4 To investigate the spatiotemporal role of Pol $\beta$  in postmitotic neuronal development, we  
5 used *Nex-Cre/Pol $\beta^{fl/fl}$*  mice (Onishi et al, 2017). In control *Pol $\beta^{fl/fl}$*  mice, Pol $\beta$   
6 immunoreactivity was roughly ubiquitous throughout the neocortex and the hippocampus  
7 at P2, and its subcellular localization was predominantly nuclear (Supplemental Figure  
8 (Figure S) 1A, B). As expected, excitatory neurons including Ctip2-positive cells lost  
9 Pol $\beta$  expression in the neocortex and the hippocampus of *Nex-Cre/Pol $\beta^{fl/fl}$*  mice (Figure  
10 S1A, B). However, the cortical laminar organization and hippocampal cytoarchitecture in  
11 *Nex-Cre/Pol $\beta^{fl/fl}$*  mice seemed to be similar to those in control *Pol $\beta^{fl/fl}$*  mice (Figure S1A-  
12 C).

13 To examine whether Pol $\beta$  deficiency affects genome stability in neuronal  
14 development, DSB formation was investigated at embryonic (E16.5 and 18.5) and  
15 postnatal stages (P2, 15, 28 and 90) by immunohistochemical analysis with an antibody  
16 against  $\gamma$ H2AX, a DSB marker (Onishi et al, 2017, Rogakou et al, 1999, Rogakou et al,  
17 1998). Strong signals of  $\gamma$ H2AX foci were frequently found in *Nex-Cre/Pol $\beta^{fl/fl}$*   
18 hippocampal pyramidal cell nuclei at P15, while only a few cells were focus-positive in  
19 controls (Figure 1A, B). Quantitative analyses showed that both the number of foci in a  
20 nucleus and the fraction of focus-positive cells were significantly larger in *Nex-*  
21 *Cre/Pol $\beta^{fl/fl}$*  pyramidal cells than in control *Pol $\beta^{fl/fl}$*  (Figure 1D, E). Consistent with these  
22 observations, immunostaining with 53BP1, a protein involved in non-homologous end  
23 joining (NHEJ), also showed focus formation in *Nex-Cre/Pol $\beta^{fl/fl}$*  mice (Figure S1D),  
24 strongly indicating that the foci were due to DSB formation (Schultz et al, 2000). The  
25 developmental time course further demonstrated that  $\gamma$ H2AX foci were undetectable  
26 during the embryonic stages (Figure S2A) and appeared from P2 (Figure 2A). The signals  
27 just peaked at P15 and then decreased until the 3-month adult stage (Figure 2A, C, D).

1 Similarly, a fraction of neocortical neurons in *Nex-Cre/Polβ<sup>fl/fl</sup>* mice also exhibited a  
2 transient increase of  $\gamma$ H2AX focus formation with a comparable developmental time  
3 course (Figure 1A, C-E and 2B, E, F), although the increase was less marked than in  
4 hippocampal pyramidal neurons (Figure 1D, E; the fraction of  $\gamma$ H2AX focus-positive  
5 cells at P15 was 79% in the hippocampus and 20% in the neocortex). These results  
6 indicate that Pol $\beta$  deficiency transiently increases DSB formation during postnatal  
7 neuronal development, although the extent of DSBs differs between brain regions.

8 A next question is whether DSB accumulation induces neuronal apoptosis as  
9 observed in *Emx1-Cre/Polβ<sup>fl/fl</sup>* mice (Onishi et al, 2017). Anti-cleaved caspase-3  
10 immunohistochemistry was performed in *Nex-Cre/Polβ<sup>fl/fl</sup>* mice. Unexpectedly, few  
11 cleaved caspase 3-positive cells were observed in *Nex-Cre/Polβ<sup>fl/fl</sup>* hippocampus and  
12 cortex at P2 and P15, during which DSB formation increases. The abundance of apoptotic  
13 cells was similar to that in control *Polβ<sup>fl/fl</sup>* mice (Figure S2C). Taken together, these results  
14 suggest that Pol $\beta$  deficiency leads to genome instability, but does not affect cell survival,  
15 in hippocampal and cortical neurons during postnatal development.

16

### 17 **Pol $\beta$ is required for base excision repair in postmitotic neurons**

18 Pol $\beta$  is a key enzyme in BER but not in DSB repair (DSBR) (Sobol et al, 1996, Wilson  
19 et al, 2000). The DSB formation in Pol $\beta$ -deficient neurons may be due to accumulation  
20 of single-strand breaks (SSBs) as BER intermediates (Caldecott, 2003). To test this  
21 possibility, immunohistochemical analysis with an antibody against XRCC1, an SSB  
22 marker (Caldecott, 2003, El-Khamisy et al, 2003), was performed. Fluorescence intensity  
23 of XRCC1 was significantly increased in P15 *Nex-Cre/Polβ<sup>fl/fl</sup>* hippocampal CA1  
24 pyramidal cell nuclei compared to control *Polβ<sup>fl/fl</sup>* nuclei (Figure 3A-C). In addition, the  
25 XRCC1 intensity increased even during normal hippocampal development from P2 to  
26 P15 (Figure 3A, C), similar to developmental changes of the  $\gamma$ H2AX foci in *Nex-*  
27 *Cre/Polβ<sup>fl/fl</sup>* mice (Figure 2). These results suggest the possibility that an abnormal level

1 of SSBs in *Nex-Cre/Polβ<sup>fl/fl</sup>* mice leads to DSB formation.

2 The sensitivity of Polβ-deficient neurons to specific DNA-damaging agents was  
3 examined to reveal the role of Polβ in BER and DSBR. Primary cultured neurons from  
4 E16.5 control or *Nex-Cre/Polβ<sup>fl/fl</sup>* mouse cortex were treated with  
5 methylmethanesulfonate (MMS), which induces base damage (Beranek, 1990; Kulkarni  
6 et al, 2008; Sobol et al, 1996), or etoposide, an inhibitor of topoisomerase II that induces  
7 DSBs (Dobbin et al, 2013; Ross et al, 1984). Polβ-deficient neurons showed higher  
8 sensitivity to MMS than control (Figure 3D, E). In contrast, there was no significant  
9 difference following the etoposide treatment (Figure 3D, E). In addition, γH2AX focus  
10 formation after MMS treatment was significantly increased in neuronal cultures from  
11 *Nex-Cre/Polβ<sup>fl/fl</sup>* mice compared to those from *Polβ<sup>fl/fl</sup>* mice (Figure 3F-H). Taken together,  
12 these results demonstrate that Polβ is required for BER rather than DSBR, suggesting that  
13 highly accumulated SSBs are converted to DSBs in Polβ-deficient neurons during  
14 postnatal development.

15

## 16 **Loss of Polβ in active DNA demethylation causes DSBs in developing neurons**

17 To examine the possibility that active DNA demethylation was a cause of the DSB  
18 formation in Polβ-deficient neurons during postnatal development (Lister et al, 2013;  
19 Sharma et al, 2016; Wu & Zhang, 2017), developmental changes in 5mC and 5hmC levels  
20 were quantified between P2 and P28. Immunoblot analysis with specific antibodies  
21 revealed that both 5mC and 5hmC levels decreased strongly in control *Polβ<sup>fl/fl</sup>*  
22 hippocampus between P2 and P15 (Figure 4A, B), during which the extent of SSB and  
23 DSB formation increased (Figure 2, 3A-C). This suggests that many DNA demethylation  
24 reactions occur on the genome during this period.

25 We examined whether inhibition of the active DNA demethylation process could  
26 affect DSB formation in Polβ-deficient hippocampal neurons *in vivo*. Overexpression of  
27 microRNAs miR29a and miR29b-1 has been reported to inhibit expression of several



1 genes involved in DNA methylation and demethylation processes, resulting in a decrease  
2 in 5hmC level in transfected cells (Cheng et al, 2013; Hysolli et al, 2016). The miRNA  
3 expression vector was transfected into CA1 neurons in *Nex-Cre/Polβ<sup>fl/fl</sup>* hippocampus  
4 using an *in utero* electroporation technique. miR29a/b-1 efficiently decreased the 5hmC  
5 level in the transfected hippocampal neurons (Figure 4C). The numbers of  $\gamma$ H2AX foci  
6 and of focus-positive cells in  $\gamma$ H2AX foci were significantly lower in the transfected  
7 neurons than in the surrounding untransfected neurons of P15 *Nex-Cre/Polβ<sup>fl/fl</sup>*  
8 hippocampus (Figure 4D-G), indicating that inhibition of active DNA demethylation  
9 suppresses DSB formation.

10 Conversely, we tested whether induction of active demethylation promotes DSB  
11 formation in Polβ-deficient cortical neurons. TET1 catalytic domain (TET1CD), which  
12 induces 5hmC more efficiently than full-length TET1 (Tahiliani et al, 2009), was  
13 overexpressed in cortical neurons using *in utero* electroporation. As expected, the 5hmC  
14 level increased in both the transfected *Polβ<sup>fl/fl</sup>* and *Nex-Cre/Polβ<sup>fl/fl</sup>* cortical neurons at P7  
15 (Figure 4H). The  $\gamma$ H2AX foci were increased in the transfected neurons compared to the  
16 untransfected neurons of *Nex-Cre/Polβ<sup>fl/fl</sup>* cortex, but not of *Polβ<sup>fl/fl</sup>* cortex (Figure 4I).  
17 Quantitative analysis also demonstrated that both parameters of  $\gamma$ H2AX foci were  
18 significantly increased in the transfected neurons relative to the surrounding neurons in  
19 *Nex-Cre/Polβ<sup>fl/fl</sup>* cortex, indicating that induction of active DNA demethylation is  
20 sufficient to promote DSB formation in Polβ-deficient cortical neurons (Figure 4J, K).

21 Finally, to modulate the endogenous active DNA demethylation process,  
22 cultured cortical neurons from E16.5 *Nex-Cre/Polβ<sup>fl/fl</sup>* and *Polβ<sup>fl/fl</sup>* mice were treated with  
23 vitamin C, which induces TET1 activity (Blaschke et al, 2013). Immunocytochemistry  
24 with anti-5hmC antibody showed an apparent increase in 5hmC level following 24-h  
25 vitamin C treatment in both control and Polβ-deficient neuronal nuclei (Figure S3A).  
26 Analysis of the DSB formation under this culture condition demonstrated that both the  
27 number of  $\gamma$ H2AX foci and the proportion of focus-positive cells were significantly  
28 increased in *Nex-Cre/Polβ<sup>fl/fl</sup>* neurons but not in controls (Figure S3B-D). Together, these

1 results suggest that active DNA demethylation is a primary cause of DSB formation in  
2 Pol $\beta$ -deficient neurons during postnatal development.

3

#### 4 **Pol $\beta$ deficiency affects gene expression and dendrite morphology of hippocampal** 5 **neurons during postnatal development**

6 To investigate the possibility that active DNA demethylation defects and/or DSB  
7 formation alter gene expression in Pol $\beta$ -deficient neurons, RNA-seq analysis was  
8 performed with RNA extracted from P15 control *Pol $\beta$ <sup>fl/fl</sup>* and *Nex-Cre/Pol $\beta$ <sup>fl/fl</sup>*  
9 hippocampus. Overall, 219 genes were found to be downregulated, and 199 upregulated,  
10 in the *Nex-Cre/Pol $\beta$ <sup>fl/fl</sup>* hippocampus compared to the control (Figure 5A; n = 3, p < 0.05,  
11 fold change > 1.2). A functional annotation analysis of these 418 differentially expressed  
12 genes (DEGs) was performed using Ingenuity Pathway Analysis (IPA) software (Figure  
13 S4A-C). Genes related to nervous system development and function (p =  $1.41 \times 10^{-2}$ ) and  
14 to neurological diseases (p =  $1.26 \times 10^{-4}$ ), in addition to cancer, were significantly  
15 enriched in the DEGs (Figure 5B, C). In the canonical pathways identified by the IPA,  
16 signaling pathways related to cell cycle regulation, DNA damage response, and cancer  
17 cells were primarily suggested (Figure 5D), which may reflect a response to DSB  
18 formation in Pol $\beta$ -deficient neurons. In addition, among the top hits, the assembly of RNA  
19 polymerase I complex (p = 0.012), the opioid signaling pathway (p = 0.013), and the  
20 Wnt/Ca<sup>+</sup> pathway (p = 0.016), which are known to relate to neuronal development and  
21 learning and memory in the hippocampus, were included (Capitano et al, 2016; Inestrosa  
22 & Varela-Nallar, 2015; Williams et al, 2001). These results indicate that Pol $\beta$  deficiency  
23 affects the regulation of genes involved in neuronal development and function.  
24 Furthermore, a marked similarity was identified in the gene expression profiles between  
25 the Pol $\beta$ -deficient hippocampus and TET3 shRNA-transfected hippocampal neurons (Yu  
26 et al, 2015) using Illumina correlation engine software (Figure S4D), suggesting that  
27 some of the overlapped genes are under the control of active DNA demethylation.

1           The altered gene expression in the *Nex-Cre/Polβ<sup>fl/fl</sup>* hippocampus may affect  
2 development of hippocampal neurons. Dendritic morphology of CA1 pyramidal neurons  
3 was examined in the *Nex-Cre/Polβ<sup>fl/fl</sup>* and *Polβ<sup>fl/fl</sup>* hippocampus. To visualize the  
4 morphology of individual neurons, sparse cell labeling was performed with the  
5 Supernova system using *in utero* electroporation (Luo et al, 2016; Mizuno et al, 2014).  
6 While both apical and basal dendrites of *Nex-Cre/Polβ<sup>fl/fl</sup>* CA1 neurons appeared to be  
7 similar to those in the control (Figure 5E), dendritic width (*Polβ<sup>fl/fl</sup>* vs *Nex-Cre/Polβ<sup>fl/fl</sup>*;  
8  $301 \pm 28 \mu\text{m}$ ,  $228 \pm 13 \mu\text{m}$ ,  $p = 0.0204$ , ANOVA) and total dendrite length (*Polβ<sup>fl/fl</sup>* vs  
9 *Nex-Cre/Polβ<sup>fl/fl</sup>*;  $4775 \pm 263 \mu\text{m}$ ,  $3997 \pm 207 \mu\text{m}$ ,  $p = 0.0248$ , ANOVA) were  
10 significantly lower in *Nex-Cre/Polβ<sup>fl/fl</sup>* than in *Polβ<sup>fl/fl</sup>* neurons (Figure 5F). These results  
11 suggest that Polβ is required for dendrite formation in the developing hippocampus.

12

### 13 ***Nex-Cre/Polβ<sup>fl/fl</sup>* mice show impaired spatial reference memory and contextual fear** 14 **memory**

15 To further examine the involvement of Polβ in neuronal functions, *Nex-Cre/Polβ<sup>fl/fl</sup>* mice  
16 and their littermates were subjected to a comprehensive behavioral test battery (Shoji et  
17 al, 2018). Significant behavioral differences between control and mutant mice were found  
18 in several behavioral tests (Supplemental Table (Table S) 1). Notably, in the Barnes maze  
19 test, which is widely used for assessing spatial learning and memory, the number of errors  
20 to reach the target was significantly larger in *Nex-Cre/Polβ<sup>fl/fl</sup>* mice than in control *Polβ<sup>fl/fl</sup>*  
21 mice (Figure 6A;  $p = 0.0003$ ). Consistent with this, the traveling distance and the latency  
22 were also significantly different between the two groups (Figure 6B, C). In the probe test  
23 at one day after final trial of the acquisition test, *Nex-Cre/Polβ<sup>fl/fl</sup>* mice spent significantly  
24 less time around their targets compared to the control (Figure 6D,  $34.6 \pm 3.9\%$ ,  $20.7 \pm$   
25  $2.1\%$ ,  $p = 0.0031$ ), confirming impaired spatial learning and memory due to distal  
26 environmental cues. This behavior was observed at one month after the acquisition test  
27 (Table S1). In the contextual and cued fear conditioning test, which is used to assess fear

1 memory, no difference was found in freezing time during the conditioning phase and at  
2 one day after the conditioning (Figure 6E, Table S1). However, *Nex-Cre/Polβ<sup>fl/fl</sup>* mice  
3 showed a shorter freezing time in the contextual test at one month after the conditioning,  
4 but not in the cued test (Figure 6F, G). In addition, *Nex-Cre/Polβ<sup>fl/fl</sup>* mice also showed  
5 reduced anxiety behavior in the elevated plus maze (Figure 6H, I). Taking into  
6 consideration that spatial memory, contextual fear memory, and anxiety behavior are  
7 dependent on hippocampus function (Jimenez et al, 2018; Kim & Fanselow, 1992;  
8 Koopmans et al, 2003), these results suggest that the lack of Polβ tends to impair  
9 hippocampus-dependent functions.  
10

## 1 **Discussion**

2 The present study demonstrated that the loss of Pol $\beta$  leads to DSB accumulation in  
3 developing hippocampal neurons, and to a lesser extent in cortical neurons, which is  
4 attributable to a failure of active DNA demethylation. The DSB accumulation in Pol $\beta$ -  
5 deficient neurons did not induce apoptosis, but affected gene expression and dendritic  
6 morphology in hippocampal neurons. Furthermore, behavioral tests demonstrated that the  
7 loss of Pol $\beta$  impaired hippocampal-dependent function. These results suggest that  
8 genome maintenance by Pol $\beta$  contributes to hippocampal neuronal differentiation and  
9 functional circuit formation via epigenetic regulation of gene expression (Figure 6J).

10

## 11 **Pol $\beta$ -dependent BER is involved in active DNA demethylation during postnatal** 12 **development of the nervous system**

13 Our results show that Pol $\beta$  plays a role in an active DNA demethylation process in  
14 postmitotic neuronal development (Figure 4), giving a first insight into its function in  
15 epigenome regulation *in vivo* (Weber et al, 2016). In the case of DNA demethylation in  
16 postmitotic cells, the TET-dependent active process involving BER seems to be a major  
17 reaction because the passive process coupled with DNA replication is dysfunctional  
18 (Schuermann et al, 2016; Wu & Zhang, 2017). Indeed, the decrease in DNA methylation  
19 level was paralleled by accumulation of SSBs, which may be BER intermediates, in the  
20 developing hippocampal genome (Figure 3A, B, 4A, and B). The timing between P2 and  
21 P15 is roughly consistent with previous studies (Lister et al, 2013; Simmons et al, 2013).  
22 Data in the culture experiment (Figure S3A) suggest that vitamin C is also important to  
23 promote active DNA demethylation during this period (Blaschke et al, 2013).

24 Moreover, Pol $\beta$  deficiency altered expression of neuronal genes that are involved  
25 in transcription regulation (Olig2, Hdac9), the cytoskeleton (Flna, Homer2), and synaptic  
26 transmission (Drd2, Chrna5) (Figure 5A-C). The altered gene expression patterns were  
27 observed consistently in all tested samples of hippocampus in *Nex-Cre/Pol $\beta$ <sup>fl/fl</sup>* mice,

1 meaning that the alterations are determinate rather than stochastic, as is different from  
2 spontaneous DNA base damage (Figure 5A-C). Expression profiles of TET3 shRNA  
3 knockdown hippocampal neurons are also similar to those of *Nex-Cre/Polβ<sup>fl/fl</sup>*  
4 hippocampus (Figure S4D) (Rudenko et al, 2013, Yu et al, 2015). These results support  
5 the notion that Polβ contributes to specific gene regulation via active DNA demethylation  
6 during hippocampal development. The greater abundance of DSBs in hippocampal than  
7 in cortical neurons may reflect distinct gene expression profiles during this period (Figure  
8 1). Therefore, it is likely that Polβ-dependent active DNA demethylation is involved in  
9 epigenetic regulation of nervous system development, although we need more studies  
10 focusing on neuronal cell types, developmental stages, and neural activities (Gontier et  
11 al, 2018; Kaas et al, 2013; Li et al, 2014; Yu et al, 2015; Zhu et al, 2016).

12

### 13 **Genome instability arising from Polβ deficiency leads to long-lasting effects on the** 14 **genome and epigenome, rather than to apoptosis**

15 We found that Polβ is required for the genome stability of postmitotic neurons (Figure 1).  
16 Combining this observation with previous studies, Polβ-dependent BER appears to play  
17 a key role in suppressing DSB formation at two distinct developmental stages, namely  
18 neurogenesis and postnatal neuronal differentiation. Why does the loss of Polβ induce  
19 DSBs in developing neurons? Polβ deficiency generally increases nicks and/or gaps as  
20 SSBs in the genome (Sobol et al, 1996). Indeed, SSBs increased significantly in Polβ-  
21 deficient neurons *in vivo* (Figure 3A–C). Although DNA replication can promote DSB  
22 formation from a single SSB in the case of mitotic neural progenitors (Kuzminov, 2001;  
23 Onishi et al, 2017), accumulation of SSBs may directly induce DSBs in postmitotic  
24 neurons. Supporting this notion, base damage introduced by MMS treatment induced  
25 DSBs in Polβ-deficient neuronal cultures (Figure 3F–H). On the other hand, neuronal  
26 apoptosis was undetectable in *Nex-Cre/Polβ<sup>fl/fl</sup>* hippocampal neurons (Figure S2C).  
27 Induction of apoptosis seems to be dependent on not only the extent of DSBs but also p53

1 pathway activity (Chong et al, 2000; Sugo et al, 2004).

2           The collapse of the active DNA demethylation process due to loss of Pol $\beta$  causes  
3 DSB formation in postmitotic neurons (Figure 1). However, the extent of  $\gamma$ H2AX foci in  
4 *Nex-Cre/Pol $\beta$ <sup>fl/fl</sup>* mice declined after a peak at P15 (Figure 2). This suggests that DSBs in  
5 Pol $\beta$ -deficient neurons are repaired by the DSBR pathway. Considering that postmitotic  
6 neurons only have NHEJ activity, which is error-prone DNA repair compared to  
7 homologous recombination in mitotic cells, mutations such as insertions/deletions are  
8 likely introduced into the DSB sites (Lieber, 2010). It will be interesting to determine  
9 whether DSBs and/or DSB-induced *de novo* somatic mutations are intensively introduced  
10 into mC-rich enhancer and promoter regions in neuronal genes. Indeed, the human  
11 neuronal genome and epigenome are drastically altered in the developing brain and this  
12 probably has a long-lasting influence on the brain into adulthood. (Cai et al, 2014; Lodato  
13 et al, 2015; Rehen et al, 2005; Stroud et al, 2017; Wei et al, 2016). Recent work has  
14 revealed that such alterations is increased in psychiatric diseases, although the underlying  
15 mechanism remains uncertain (Bundo et al, 2014; Fromer et al, 2014; Iossifov et al, 2014;  
16 McConnell et al, 2013). Our findings indicate that active DNA demethylation-associated  
17 DNA damage is a potential cause of *de novo* somatic mutations and an aberrant  
18 epigenome in brain developmental disorders.

19

## 20 **The role of Pol $\beta$ in structure and function of the cerebral cortex**

21 Pol $\beta$  plays a role in the molecular bases underlying dendrite formation (Figure 5E, F). To  
22 date, TET1 and TET3 have also been shown to be involved in synaptic excitability and  
23 plasticity (Rudenko et al, 2013, Yu et al, 2015). These data suggest that DNA  
24 demethylation is necessary for neuronal development. On the other hand, it has also been  
25 demonstrated that the DNA methyltransferases Dnmt1, Dnmt3a, Dnmt3b, and the methyl-  
26 CpG binding protein MeCP2 are involved in dendritic arborization (Cohen et al, 2011;  
27 Feng et al, 2010; Golshani et al, 2005; Moretti et al, 2006; Zhou et al, 2006). Therefore,

1 gene expression mediated by the bidirectional regulation of DNA methylation and  
2 demethylation may be crucial for neuronal development and circuit formation.

3 A comprehensive behavioral test with *Nex-Cre/Polβ<sup>fl/fl</sup>* mice showed a  
4 remarkable impairment in spatial reference memory and contextual fear memory (Figure  
5 6A-G). This concurs with recent reports suggesting that active DNA demethylation is  
6 involved in learning and memory in adult mice (Gontier et al, 2018; Kaas et al, 2013; Li  
7 et al, 2014; Rudenko et al, 2013). However, considering that DSB accumulation in Polβ-  
8 deficient neurons is most prominent in early postnatal stages, we propose that DSBs  
9 and/or DSB-induced *de novo* mutations arising from the impairment of active DNA  
10 demethylation alter gene expression leading to circuit formation, and have a long-lasting  
11 influence on learning and memory. Indeed, the functional impairment was striking in the  
12 hippocampus (Figure 6, Table S1), in which DSBs accumulated extensively during the  
13 early postnatal stages (Figure 1, 2).

14 While active DNA demethylation is revealed as a potential source of DNA  
15 damage during early postnatal stages in *Nex-Cre/Polβ<sup>fl/fl</sup>* mice, we cannot completely rule  
16 out the possibility that oxidative stress causes DNA damage, leading to cognitive  
17 dysfunction in the adult (Wilson & McNeill, 2007). Indeed, Polβ-dependent impairment  
18 of cognitive function is reportedly accelerated in aged brains and Alzheimer's disease  
19 models (Sykora et al, 2015). Moreover, the expression of DNA repair enzymes including  
20 Polβ gradually decreases with increased oxidative DNA damage associated with aging  
21 (Lu et al, 2004; Nowak et al, 1990; Rao et al, 2001; Wilson & McNeill, 2007). Therefore,  
22 although pathological changes with aging can affect the role of Polβ in neurons, our  
23 findings provide a key insight into its role during early postnatal development, which has  
24 long-lasting cognitive and behavioral outcomes.

25  
26



## 1 **Methods**

### 2 **Animals**

3 All experiments were conducted under the guidelines for laboratory animals of the  
4 Graduate School of Frontier Biosciences, Osaka University. The protocol was approved  
5 by the Animal Care and Use Committee of the Graduate School of Frontier Biosciences,  
6 Osaka University and Fujita Health University. *Nex<sup>Cre/+</sup>Polβ<sup>fl/fl</sup>* (*Nex-Cre/Polβ<sup>fl/fl</sup>*) mice  
7 were generated as described previously (Goebbels et al, 2006; Gu et al, 1994; Iwasato et  
8 al, 2000; Onishi et al, 2017). Both male and female mice were used in all experiments  
9 expect RNA-seq analysis and the behavioral test. Noon of the day on which the vaginal  
10 plug was detected was designated as embryonic day 0.5 (E0.5) and the day of birth was  
11 designated as postnatal day 0 (P0). Genotyping was performed using the following  
12 primers: Polβ locus: 5'-CCACACCGAAGTCCTCTGAT-3', 5'-  
13 AGGCTGGCCTCAGACTCATA-3' and 5'-CTGGCTCACGTTCTTCTC-3'; Cre locus:  
14 5'-GCAGAACCTGAAGATGTTCGCGAT-3' and 5'-  
15 AGGTATCTCTGACCAGAGTCATCC-3'.

16

### 17 **Cell cultures**

18 Pregnant mice were deeply anesthetized with pentobarbital (50 mg/kg, i.p.). Cortices  
19 were dissected from E16.5 embryos in ice-cold HBSS and then minced with fine scissors  
20 in PBS. The minced tissues were incubated with 0.125% trypsin and 0.02% EDTA in PBS  
21 for 5 min at 37°C, and then triturated thoroughly using a fire-polished Pasteur pipette.  
22 After centrifugation, the cells were resuspended in DMEM/F12 medium (Life  
23 Technologies) supplemented with B27 (Life Technologies) and 5% fetal bovine serum  
24 (Hyclone). A suspension containing  $2.0 \times 10^5$  cells was plated with culture medium on a  
25 12 mm micro coverglass (Matsunami) in a multi-well dish (Thermo Scientific) coated  
26 with 0.1 mg/ml poly-L-ornithine (Sigma, P3655). The cultures were maintained at 37°C  
27 in an environment of 5% CO<sub>2</sub> and humidified 95% air.

## 1 **Plasmids**

2 pFN21AE2295, containing HaloTag-human TET1 cDNA, was purchased from Promega.  
3 To generate TET1 catalytic domain (TET1CD) expression vector pCAGGS-TET1CD,  
4 TET1CD was amplified from pFN21AE2295 by PCR with the following primers:  
5 TET1CD-F (+start) 5'-ATGGAAGTGGCCACCTGCAGCTGTCT-3' and TET1CD-R  
6 (+stop) 5'-TCAGACCCAATGGTTATAGGGCCCCG-3'. The PCR product was  
7 subcloned into pGEM-T Easy vector (A1360, Promega). An EcoRI-digested fragment  
8 containing TET1CD was then ligated to EcoRI-digested pCAGGS vector (Niwa et al,  
9 1991). To generate pCAGGS-miR29a/b-1, the miR29a/b-1 cluster locus was amplified  
10 from mouse genomic DNA by PCR with the following primers: miR29a/b-1 F: 5'-  
11 TGTGTTGCTTTGCCTTTGAGAGGA-3' and miR29a/b-1 R: 5'-  
12 CACATAGGGATAGTCACCTAGCCTG-3'; the product was subcloned into pGEM-T  
13 Easy vector. An EcoRI-digested fragment containing miR29a/b-1 locus was then ligated  
14 to EcoRI-digested pCAGGS vector. Supernova vectors pTRE-Flpe-WPRE (pK036) and  
15 pCAG-FRT-stop-FRT-tRFP-ires-tTA-WPRE (pK037) were kindly gifted from Dr.  
16 Iwasato (Luo et al, 2016). These vectors were cotransfected with pCAGGS-EGFP. All  
17 plasmids were purified with the PureLink HiPure Plasmid Maxiprep Kit (Invitrogen), and  
18 then dissolved in PBS.

19

## 20 ***In utero* electroporation**

21 *In utero* electroporation was performed on E15.5 pregnant mice as previously described  
22 (Fukuchi-Shimogori & Grove, 2001, Tabata & Nakajima, 2001, Tomita, Kubo et al, 2011).  
23 Pregnant mice were deeply anesthetized with isoflurane (Wako Chemicals) using  
24 inhalation anesthesia equipment (KN-1071-1, Natsume). Plasmids (1-3 µg) were injected  
25 to the lateral ventricle with a glass micropipette connected to an injector (IM-30,  
26 Narishige). Electric pulses were delivered with disc-type electrodes (LF650P3 or  
27 LF650P5, BEX) connected to an electroporator (CUY21, BEX). Five 35-V pulses of 50

1 ms duration were applied at intervals of 950 ms.

2

### 3 **Pharmacological treatment**

4 For a cell survival assay, cells at 3–4 DIV were incubated with culture medium containg  
5 0–0.8 mM methylmethanesulfonate (MMS, Sigma, 129925) or 0–8  $\mu$ M etoposide (Sigma,  
6 E1383) for 1 h, washed once with DMEM/F12 medium, and allowed to recover in  
7 conditioned medium for 24 h. To induce DNA base damage, cells at 14 DIV were treated  
8 with culture medium containing 0.4 mM MMS for 1 h, and then fixed. To induce Tet-  
9 dependent DNA demethylation, cells at 14 DIV were treated with culture medium  
10 containing 100  $\mu$ g/ml L-ascorbic acid 2-phosphate (vitamin C, Sigma, 49752) for 24 h,  
11 and then fixed.

12

### 13 **Immunostaining**

14 Mice were deeply anesthetized and perfused with phosphate buffered saline (PBS, pH  
15 7.4) followed by 2% paraformaldehyde (PFA) in 0.1 M phosphate buffer (PB, pH 7.4).  
16 Their brains were postfixed in the same fixative on ice for 2 h, equilibrated with 25%  
17 sucrose in PBS, frozen in OCT compound (Sakura Finetech), and then sectioned at 10 or  
18 20  $\mu$ m using a cryostat (CM1850, Leica). The sections were permeabilized and blocked  
19 for 1 h at room temperature in buffer G (0.1 or 1.0% Triton X-100, 5% normal goat serum  
20 (Vector Laboratories) in PBS). They were then incubated at 4°C overnight with the  
21 following primary antibodies diluted in buffer G: rabbit polyclonal anti-cleaved caspase-  
22 3 (Asp175) (Cell Signaling, #9661) at 1:250, rabbit polyclonal anti-histone H2AX  
23 phosphor Ser139 (Active Motif, AR-0149-10) at 1:200, rabbit polyclonal anti-53BP1  
24 (Gene Tex, GTX102595) at 1:200, rabbit monoclonal anti-XRCC1 (Abcam, ab134056)  
25 at 1:200, rat polyclonal anti-Ctip2 (Abcam, ab18465) at 1:800, rat monoclonal anti-GFP  
26 (Nacalai Tesque, GF090R) at 1:1000, and rabbit polyclonal anti 5-  
27 hydroxymethylcytosine (5hmC) (Active Motif, 39769) at 1:20000. Immunostaining of

1 Pol $\beta$  was performed as described previously (Onishi et al, 2017). For XRCC1 and 5hmC  
2 immunostaining, the sections were treated with 10 mM sodium citrate buffer (pH 6.0) for  
3 10 min at 98°C using an autoclave. For co-immunostaining with anti-5hmC and -GFP  
4 antibodies, anti-GFP antibody was preincubated overnight at 4°C before the antigen  
5 retrieval step. Primary antibodies were detected by incubation with the secondary  
6 antibodies Alexa488-conjugated anti-rabbit IgG (A-11034, Invitrogen), Alexa488-  
7 conjugated anti-rat IgG (A-11006, Invitrogen), Alexa594-conjugated anti-rabbit IgG  
8 (A21207, Invitrogen), Cy3-conjugated anti-mouse IgG (AP192C, Millipore), Cy3-  
9 conjugated anti-rabbit IgG (AP182C, Millipore), and Cy3-conjugated anti-rat IgG  
10 (AP136C, Millipore), in all cases diluted at 1:400 in buffer G for 2 h at room temperature.  
11 Finally, the sections were mounted with a medium containing 0.1% 4', 6-diamidino-2'-  
12 phenylindole (DAPI, Sigma), 1, 4-diazabicyclo [2, 2, 2] octane (Sigma) and 50 or 80%  
13 glycerol in 50 mM Tris-HCl (pH 8.0).

14 For morphological analysis of dendrites, mice were perfused with 4% PFA in 0.1  
15 M PB (pH 7.4). The brains were postfixed in the same fixative for 24 h at 4°C, and  
16 equilibrated with 25% sucrose-PBS overnight at 4°C. The brains were cut into 200- $\mu$ m  
17 coronal sections using a vibratome (DTK-1000, D.S.K.). The free-floating sections were  
18 permeabilized and blocked in buffer G for 1 h at room temperature. They were then  
19 incubated with primary antibodies, rat monoclonal anti-GFP (Nacalai Tesque, GF090R)  
20 at 1:2000 and rabbit polyclonal anti-tRFP (Evrogen, AB233) at 1:2000, in buffer G  
21 overnight at 4°C. The sections were washed three times with 0.1% Triton X-100 in PBS  
22 (PBST) for 1 h, and incubated with secondary antibodies in buffer G overnight at 4°C.  
23 The sections were then washed three times with PBST for 1 h and mounted with DAPI-  
24 containing mounting medium.

25 Cultured cells were fixed with 4% PFA in PBS for 10 min at room temperature,  
26 washed three times with PBS for 10 min, permeabilized, and blocked in buffer G. The  
27 cells were then incubated overnight at 4°C in buffer G with the following antibodies:  
28 mouse monoclonal anti-Tuj1 (R&D Systems, MAB1195) at 1:1000, rabbit polyclonal

1 anti-histone H2AX phosphor Ser139 (Active Motif, AR-0149-10) at 1:200, and rabbit  
2 polyclonal anti 5-hydroxymethylcytosine (Active Motif, 39769) at 1:20000. For 5hmC  
3 immunostaining, the cells were incubated with 1 M HCl for 30 min at 37°C and washed  
4 three times with PBS for 30 min before permeabilization. Primary antibodies were  
5 detected by incubation for 2 h at room temperature in buffer G with the following  
6 secondary antibodies: Alexa488-conjugated anti rabbit IgG (A-11034, Invitrogen) at  
7 1:400 and Cy3-conjugated anti-mouse IgG (AP192C, Millipore) at 1:400. The cells were  
8 mounted with DAPI-containing mounting medium.

9

## 10 **Image analysis**

11 Fluorescence images were obtained by confocal microscopy (ECLIPSE FN with EZ-C1;  
12 Nikon) with 10×/0.3, 20×/0.75, and 40×/0.95 objective lenses (Nikon). All images were  
13 imported into ImageJ to adjust brightness and contrast. To acquire images of  $\gamma$ H2AX and  
14 XRCC1 in DAPI-stained nuclei, confocal z-stack images were collected at 0.5- $\mu$ m  
15 intervals with a 40× objective lens. For focus counting, noise in the images was removed  
16 by Gaussian filter and subtraction from the background, and foci were detected with the  
17 “Find Maxima” tool in ImageJ. To obtain images of RFP-labeled apical and basal  
18 dendrites in dorsal hippocampal CA1 regions, confocal z-stack images were collected at  
19 1- $\mu$ m intervals through the 200- $\mu$ m sections using a 20× objective lens. Quantitative  
20 analysis of dendrite morphology was performed using the ImageJ plug-ins Simple Neurite  
21 Tracer and L-measure (Scorcioni et al, 2008).

22

## 23 **Immunoblot analysis**

24 Genomic DNA was extracted using a DNeasy Blood & Tissue kit (QIAGEN). The DNA  
25 was eluted with TE buffer and stored at -30°C until required. The genomic DNA was  
26 denatured in 20 mM Tris-HCl (pH 8.0) for 10 min at 98°C and chilled on ice. Serially  
27 diluted DNA samples (1000, 500, 250, 125 ng/200  $\mu$ l) were blotted onto a positively

1 charged nylon membrane (Millipore, INYC00010) using a Bio-Dot slot blot apparatus  
2 (Bio-Rad). The membrane was air-dried, and UV-crosslinked using a CL-1000  
3 Ultraviolet Crosslinker (UVP). The membrane was stained with 0.02% methylene blue  
4 (Nacalai Tesque) for 30 min at room temperature as a loading control. The membrane  
5 was then washed with Tris-buffered saline containing 0.1% Tween-20 (TBS-T) and  
6 blocked in 5% nonfat dry milk (Cell Signaling Technology, #9999) diluted with TBS-T  
7 for 1 h at room temperature. The membrane was incubated with the following primary  
8 antibodies diluted in 5% nonfat dry milk/TBS-T overnight at 4°C: rabbit polyclonal anti-  
9 5-hydroxymethylcytosine antibody (Active Motif, 39769) at 1:5000 and mouse  
10 monoclonal anti-5-methylcytosine antibody (Active Motif, 39649) at 1:2000. Primary  
11 antibodies were detected by incubation with the following secondary antibodies diluted  
12 in 5% skim milk in TBS-T for 2 h at room temperature: peroxidase-conjugated anti-rabbit  
13 IgG antibody (Jackson ImmunoResearch, 711-035-152) at 1:5000 and peroxidase-  
14 conjugated anti-mouse IgG (Nacalai Tesque, 01803-44) at 1:5000. The signal was  
15 visualized by chemiluminescence with ECL Select western blotting detection reagent (GE  
16 Healthcare) and imaged by LAS-3000UV mini (Fujifilm).

17

## 18 **RNA seq analysis**

19 Total RNA was extracted from P15 *Polβ<sup>fl/fl</sup>* and *Nex-Cre/Polβ<sup>fl/fl</sup>* hippocampus using an  
20 RNeasy Plus Mini Kit (QIAGEN) following the manufacturer's procedure. Library  
21 preparation was performed using a TruSeq stranded mRNA sample prep kit (Illumina)  
22 according to the manufacturer's instructions. Whole-transcriptome sequencing was  
23 applied to the RNA samples with an Illumina HiSeq 2500 platform in a 75-base single-  
24 end mode. Illumina Casava ver. 1.8.2 software was used for base calling. Sequenced reads  
25 were mapped to the mouse reference genome sequences (mm10) using TopHat ver. 2.0.13  
26 in combination with Bowtie2 ver. 2.2.3 and SAMtools ver. 0.1.19. The number of  
27 fragments per kilobase of exon per million mapped fragments (FPKMs) was calculated

1 using Cufflinks ver. 2.2.1. Differentially expressed genes were defined by fold change >  
2 1.2,  $p < 0.05$  ( $n = 3$ ). Functional annotation and pathway analysis were performed with  
3 Ingenuity pathway analysis (QIAGEN). Correlation analysis of expression profiles was  
4 performed with the Illumina correlation engine software (Illumina).

5

## 6 **Behavioral test**

7 Behavioral tests were carried out at Institute for Comprehensive Medical Science, Fujita  
8 Health University (Joint Usage / Research Center for Genes, Brain and Behavior  
9 accredited by MEXT). The comprehensive behavioral test was performed as described  
10 previously (Shoji et al, 2018) with adult (> 3 month) *Nes-Cre/Polβ<sup>fl/fl</sup>* mice and their  
11 littermate controls. In brief, the Barnes maze test was performed with a white circular  
12 surface, 1.0 m in diameter, with 12 holes equally spaced around the perimeter and  
13 elevated 75 cm from the floor. A black Plexiglas escape box was located under one of the  
14 holes and represented the target. The location of the target was consistent for each mouse  
15 but randomized between mice. The visual cues were in the four corners of the  
16 experimental room. One or two trials per day were performed. The number of errors,  
17 latency to reach the target, and distance traveled before mice first reached their target  
18 were automatically calculated by image analysis. One day or one month after the last  
19 training session, a probe test was performed without the escape box for 3 min, and time  
20 spent around each hole was measured and the ratio of time spent around the target / all  
21 holes was quantified.

22 In conditioning session of contextual and cued fear-conditioning test, each  
23 mouse was placed in a transparent acrylic chamber with a stainless steel grid floor  
24 (O'Hara & Co.) and allowed to explore for 2 min. White noise (55 dB) was then presented  
25 for 30 sec as a conditioned stimulus (CS). A mild footshock (0.3 mA, 2 sec) was presented  
26 as an unconditioned stimulus (UCS) during the last 2 sec of the CS. Three CS-UCS  
27 pairings were presented with a 2-min interval. One day or one month after the

1 conditioning session, contest tests were conducted in the same chamber as conditioning.  
2 Cued tests with altered context were then conducted in a triangular and white opaque  
3 chamber which was located in a different room. In each test, freezing percentage and  
4 distance traveled in 1 min were quantified.

5 In the elevated plus maze, each mouse was placed in the central square of the  
6 maze, which consisted of two open arms (25 x 5 cm) and two closed arms (25 x 5 cm,  
7 with 15-cm-high transparent walls), and allowed to explore for 10 min. The number of  
8 total entries into the arms, percentage of entries into the open arms, and percentage of  
9 time spent in the open arms were quantified.

10

### 11 **Statistical analysis**

12 In statistical analysis, the number of samples analyzed is given for each experiment.  
13 Significant differences were determined with Student's t-test, one-way ANOVA with  
14 Tukey's post-hoc test for multiple comparisons, or repeated-measures ANOVA. All  
15 statistical values are presented as mean value  $\pm$  SEM. All data were analyzed using Excel  
16 2013 (Microsoft), StatView 5.0.1 software (SAS Institute), and JMP (SAS Institute).

17



1    **Acknowledgments**

2    We are grateful to Drs. K.A. Nave for the Nex-Cre mice, and to K. Rajewsky for Polβ  
3    flox mice. This work was supported by MEXT KAKENHI on Dynamic regulation of  
4    brain function by Scrap & Build system (No. 16H06460) to N.Y., by JSPS KAKENHI  
5    Grant Nos. 15K14350 and 17K07109 to N.S., 16H06276 (AdAMS) to N.S. and T.M., and  
6    by AMED-CREST to T.Y.

7

8    **Author contributions**

9    T.M., T.Y., N.Y. and N.S. conceived and designed the research project. A.U., K.O., T.H.,  
10   S.H. and N.S. performed the experiments and analyzed the data. A.U., T.M., T.Y., N.Y.  
11   and N.S. wrote the manuscript, which was discussed and critically edited by all coauthors.

12

13   **Declaration of interests**

14   The authors declare no competing financial interests.

15

## 1 **References**

- 2 Alt FW, Zhang Y, Meng FL, Guo C, Schwer B (2013) Mechanisms of programmed DNA  
3 lesions and genomic instability in the immune system. *Cell* 152: 417-29
- 4 Beranek DT (1990) Distribution of methyl and ethyl adducts following alkylation with  
5 monofunctional alkylating agents. *Mutat Res* 231: 11-30
- 6 Blaschke K, Ebata KT, Karimi MM, Zepeda-Martinez JA, Goyal P, Mahapatra S, Tam A,  
7 Laird DJ, Hirst M, Rao A, Lorincz MC, Ramalho-Santos M (2013) Vitamin C induces  
8 Tet-dependent DNA demethylation and a blastocyst-like state in ES cells. *Nature* 500:  
9 222-6
- 10 Bundo M, Toyoshima M, Okada Y, Akamatsu W, Ueda J, Nemoto-Miyauchi T, Sunaga F,  
11 Toritsuka M, Ikawa D, Kakita A, Kato M, Kasai K, Kishimoto T, Nawa H, Okano H,  
12 Yoshikawa T, Kato T, Iwamoto K (2014) Increased l1 retrotransposition in the neuronal  
13 genome in schizophrenia. *Neuron* 81: 306-13
- 14 Cai X, Evrony GD, Lehmann HS, Elhosary PC, Mehta BK, Poduri A, Walsh CA (2014)  
15 Single-cell, genome-wide sequencing identifies clonal somatic copy-number variation in  
16 the human brain. *Cell Rep* 8: 1280-9
- 17 Caldecott KW (2003) XRCC1 and DNA strand break repair. *DNA Repair (Amst)* 2: 955-  
18 69
- 19 Capitano F, Gargiuli C, Angerilli A, Maccaroni K, Pelliccia F, Mele A, Camilloni G  
20 (2016) RNA polymerase I transcription is modulated by spatial learning in different brain  
21 regions. *J Neurochem* 136: 706-716
- 22 Cheng J, Guo S, Chen S, Mastroianni SJ, Liu C, D'Alessio AC, Hysolli E, Guo Y, Yao H,  
23 Megyola CM, Li D, Liu J, Pan W, Roden CA, Zhou XL, Heydari K, Chen J, Park IH,  
24 Ding Y, Zhang Y et al. (2013) An extensive network of TET2-targeting MicroRNAs  
25 regulates malignant hematopoiesis. *Cell Rep* 5: 471-81
- 26 Chong MJ, Murray MR, Gosink EC, Russell HR, Srinivasan A, Kapsetaki M, Korsmeyer  
27 SJ, McKinnon PJ (2000) Atm and Bax cooperate in ionizing radiation-induced apoptosis  
28 in the central nervous system. *Proc Natl Acad Sci U S A* 97: 889-94
- 29 Cohen S, Gabel HW, Hemberg M, Hutchinson AN, Sadacca LA, Ebert DH, Harmin DA,  
30 Greenberg RS, Verdine VK, Zhou Z, Wetsel WC, West AE, Greenberg ME (2011)  
31 Genome-wide activity-dependent MeCP2 phosphorylation regulates nervous system

- 1 development and function. *Neuron* 72: 72-85
- 2 Cortellino S, Xu J, Sannai M, Moore R, Caretti E, Cigliano A, Le Coz M, Devarajan K,  
3 Wessels A, Soprano D, Abramowitz LK, Bartolomei MS, Rambow F, Bassi MR, Bruno  
4 T, Fanciulli M, Renner C, Klein-Szanto AJ, Matsumoto Y, Kobi D et al. (2011) Thymine  
5 DNA glycosylase is essential for active DNA demethylation by linked deamination-base  
6 excision repair. *Cell* 146: 67-79
- 7 Cortázar D, Kunz C, Selfridge J, Lettieri T, Saito Y, MacDougall E, Wirz A, Schuermann  
8 D, Jacobs AL, Siegrist F, Steinacher R, Jiricny J, Bird A, Schär P (2011) Embryonic lethal  
9 phenotype reveals a function of TDG in maintaining epigenetic stability. *Nature* 470: 419-  
10 423
- 11 Deans B, Griffin CS, Maconochie M, Thacker J (2000) Xrcc2 is required for genetic  
12 stability, embryonic neurogenesis and viability in mice. *EMBO J* 19: 6675-85
- 13 Dobbin MM, Madabhushi R, Pan L, Chen Y, Kim D, Gao J, Ahanonu B, Pao P-C, Qiu Y,  
14 Zhao Y, Tsai L-H (2013) SIRT1 collaborates with ATM and HDAC1 to maintain genomic  
15 stability in neurons. *Nature Neuroscience* 16: 1008-1015
- 16 El-Khamisy SF, Masutani M, Suzuki H, Caldecott KW (2003) A requirement for PARP-  
17 1 for the assembly or stability of XRCC1 nuclear foci at sites of oxidative DNA damage.  
18 *Nucleic Acids Res* 31: 5526-33
- 19 Feng J, Zhou Y, Campbell SL, Le T, Li E, Sweatt JD, Silva AJ, Fan G (2010) Dnmt1 and  
20 Dnmt3a maintain DNA methylation and regulate synaptic function in adult forebrain  
21 neurons. *Nat Neurosci* 13: 423-30
- 22 Flavell SW, Greenberg ME (2008) Signaling mechanisms linking neuronal activity to  
23 gene expression and plasticity of the nervous system. *Annu Rev Neurosci* 31: 563-90
- 24 Fromer M, Pocklington AJ, Kavanagh DH, Williams HJ, Dwyer S, Gormley P, Georgieva  
25 L, Rees E, Palta P, Ruderfer DM, Carrera N, Humphreys I, Johnson JS, Roussos P, Barker  
26 DD, Banks E, Milanova V, Grant SG, Hannon E, Rose SA et al. (2014) De novo mutations  
27 in schizophrenia implicate synaptic networks. *Nature* 506: 179-84
- 28 Fukuchi-Shimogori T, Grove EA (2001) Neocortex patterning by the secreted signaling  
29 molecule FGF8. *Science* 294: 1071-4
- 30 Gao Y, Sun Y, Frank KM, Dikkes P, Fujiwara Y, Seidl KJ, Sekiguchi JM, Rathbun GA,

- 1 Swat W, Wang J, Bronson RT, Malynn BA, Bryans M, Zhu C, Chaudhuri J, Davidson L,  
2 Ferrini R, Stamato T, Orkin SH, Greenberg ME et al. (1998) A critical role for DNA end-  
3 joining proteins in both lymphogenesis and neurogenesis. *Cell* 95: 891-902
- 4 Golshani P, Hutnick L, Schweizer F, Fan G (2005) Conditional Dnmt1 deletion in dorsal  
5 forebrain disrupts development of somatosensory barrel cortex and thalamocortical long-  
6 term potentiation. *Thalamus Relat Syst* 3: 227-233
- 7 Gontier G, Iyer M, Shea JM, Bieri G, Wheatley EG, Ramalho-Santos M, Villeda SA  
8 (2018) Tet2 Rescues Age-Related Regenerative Decline and Enhances Cognitive  
9 Function in the Adult Mouse Brain. *Cell Rep* 22: 1974-1981
- 10 Gu Y, Sekiguchi J, Gao Y, Dikkes P, Frank K, Ferguson D, Hasty P, Chun J, Alt FW  
11 (2000) Defective embryonic neurogenesis in Ku-deficient but not DNA-dependent  
12 protein kinase catalytic subunit-deficient mice. *Proc Natl Acad Sci U S A*, pp 2668-73.
- 13 He YF, Li BZ, Li Z, Liu P, Wang Y, Tang Q, Ding J, Jia Y, Chen Z, Li L, Sun Y, Li X, Dai  
14 Q, Song CX, Zhang K, He C, Xu GL (2011) Tet-mediated formation of 5-  
15 carboxylcytosine and its excision by TDG in mammalian DNA. *Science* 333: 1303-7
- 16 Hysolli E, Tanaka Y, Su J, Kim K-Y, Zhong T, Janknecht R, Zhou X-L, Geng L, Qiu C,  
17 Pan X, Jung Y-W, Cheng J, Lu J, Zhong M, Weissman SM, Park I-H (2016) Regulation  
18 of the DNA Methylation Landscape in Human Somatic Cell Reprogramming by the miR-  
19 29 Family. *Stem Cell Reports* 7: 43-54
- 20 Inestrosa NC, Varela-Nallar L (2015) Wnt signalling in neuronal differentiation and  
21 development. *Cell Tissue Res* 359: 215-23
- 22 Iossifov I, O'Roak BJ, Sanders SJ, Ronemus M, Krumm N, Levy D, Stessman HA,  
23 Witherspoon KT, Vives L, Patterson KE, Smith JD, Paeper B, Nickerson DA, Dea J, Dong  
24 S, Gonzalez LE, Mandell JD, Mane SM, Murtha MT, Sullivan CA et al. (2014) The  
25 contribution of de novo coding mutations to autism spectrum disorder. *Nature* 515: 216-  
26 21
- 27 Ito S, D'Alessio AC, Taranova OV, Hong K, Sowers LC, Zhang Y (2010) Role of Tet  
28 proteins in 5mC to 5hmC conversion, ES-cell self-renewal and inner cell mass  
29 specification. *Nature* 466: 1129-33
- 30 Ito S, Shen L, Dai Q, Wu SC, Collins LB, Swenberg JA, He C, Zhang Y (2011) Tet  
31 proteins can convert 5-methylcytosine to 5-formylcytosine and 5-carboxylcytosine.

- 1 *Science* 333: 1300-3
- 2 Jimenez JC, Su K, Goldberg AR, Luna VM, Biane JS, Ordek G, Zhou P, Ong SK, Wright  
3 MA, Zweifel L, Paninski L, Hen R, Kheirbek MA (2018) Anxiety Cells in a  
4 Hippocampal-Hypothalamic Circuit. *Neuron* 97: 670-683.e6
- 5 Kaas GA, Zhong C, Eason DE, Ross DL, Vachhani RV, Ming GL, King JR, Song H,  
6 Sweatt JD (2013) TET1 controls CNS 5-methylcytosine hydroxylation, active DNA  
7 demethylation, gene transcription, and memory formation. *Neuron* 79: 1086-93
- 8 Kim JJ, Fanselow MS (1992) Modality-specific retrograde amnesia of fear. *Science* 256:  
9 675-7
- 10 Kolodkin AL, Tessier-Lavigne M (2011) Mechanisms and molecules of neuronal wiring:  
11 a primer. *Cold Spring Harb Perspect Biol* 3
- 12 Koopmans G, Blokland A, van Nieuwenhuijzen P, Prickaerts J (2003) Assessment of  
13 spatial learning abilities of mice in a new circular maze. *Physiol Behav* 79: 683-93
- 14 Kulkarni A, McNeill DR, Gleichmann M, Mattson MP, Wilson DM, 3rd (2008) XRCC1  
15 protects against the lethality of induced oxidative DNA damage in nondividing neural  
16 cells. *Nucleic Acids Res* 36: 5111-21
- 17 Kuzminov A (2001) Single-strand interruptions in replicating chromosomes cause  
18 double-strand breaks. *Proc Natl Acad Sci U S A* 98: 8241-6
- 19 Lee Y, Chong MJ, McKinnon PJ (2001) Ataxia telangiectasia mutated-dependent  
20 apoptosis after genotoxic stress in the developing nervous system is determined by  
21 cellular differentiation status. *J Neurosci* 21: 6687-93
- 22 Lee Y, Katyal S, Li Y, El-Khamisy SF, Russell HR, Caldecott KW, McKinnon PJ (2009)  
23 The genesis of cerebellar interneurons and the prevention of neural DNA damage require  
24 XRCC1. *Nat Neurosci* 12: 973-80
- 25 Li X, Wei W, Zhao QY, Widagdo J, Baker-Andresen D, Flavell CR, D'Alessio A, Zhang  
26 Y, Bredy TW (2014) Neocortical Tet3-mediated accumulation of 5-  
27 hydroxymethylcytosine promotes rapid behavioral adaptation. *Proc Natl Acad Sci U S A*,  
28 pp 7120-5.
- 29 Lieber MR (2010) The mechanism of double-strand DNA break repair by the  
30 nonhomologous DNA end-joining pathway. *Annu Rev Biochem* 79: 181-211

- 1 Lindahl T, Wood RD (1999) Quality control by DNA repair. *Science* 286: 1897-905
- 2 Lister R, Mukamel EA, Nery JR, Urich M, Puddifoot CA, Johnson ND, Lucero J, Huang  
3 Y, Dwork AJ, Schultz MD, Yu M, Tonti-Filippini J, Heyn H, Hu S, Wu JC, Rao A, Esteller  
4 M, He C, Haghghi FG, Sejnowski TJ et al. (2013) Global epigenomic reconfiguration  
5 during mammalian brain development. *Science* 341: 1237905
- 6 Lodato MA, Woodworth MB, Lee S, Evrony GD, Mehta BK, Karger A, Chittenden TW,  
7 D'Gama AM, Cai X, Luquette LJ, Lee E, Park PJ, Walsh CA (2015) Somatic mutation in  
8 single human neurons tracks developmental and transcriptional history. *Science* 350: 94-  
9 98
- 10 Lu T, Pan Y, Kao SY, Li C, Kohane I, Chan J, Yankner BA (2004) Gene regulation and  
11 DNA damage in the ageing human brain. *Nature* 429: 883-91
- 12 Luo W, Mizuno H, Iwata R, Nakazawa S, Yasuda K, Itohara S, Iwasato T (2016)  
13 Supernova: A Versatile Vector System for Single-Cell Labeling and Gene Function  
14 Studies. *Scientific Reports* 6: 35747
- 15 Madabhushi R, Pan L, Tsai LH (2014) DNA damage and its links to neurodegeneration.  
16 *Neuron* 83: 266-282
- 17 McConnell MJ, Lindberg MR, Brennand KJ, Piper JC, Voet T, Cowing-Zitron C,  
18 Shumilina S, Lasken RS, Vermeesch J, Hall IM, Gage FH (2013) Mosaic Copy Number  
19 Variation in Human Neurons. *Science* 342: 632-7
- 20 McConnell MJ, Moran JV, Abyzov A, Akbarian S, Bae T, Cortes-Ciriano I, Erwin JA,  
21 Fasching L, Flasch DA, Freed D, Ganz J, Jaffe AE, Kwan KY, Kwon M, Lodato MA,  
22 Mills RE, Paquola ACM, Rodin RE, Rosenbluh C, Sestan N et al. (2017) Intersection of  
23 diverse neuronal genomes and neuropsychiatric disease: The Brain Somatic Mosaicism  
24 Network. *Science* 356
- 25 McKinnon PJ (2013) Maintaining genome stability in the nervous system. *Nat Neurosci*  
26 16: 1523-9
- 27 Mizuno H, Luo W, Tarusawa E, Saito YM, Sato T, Yoshimura Y, Itohara S, Iwasato T  
28 (2014) NMDAR-Regulated Dynamics of Layer 4 Neuronal Dendrites during  
29 Thalamocortical Reorganization in Neonates. *Neuron* 82: 365-379
- 30 Moore LD, Le T, Fan G (2013) DNA methylation and its basic function.

- 1 *Neuropsychopharmacology* 38: 23-38
- 2 Moretti P, Levenson JM, Battaglia F, Atkinson R, Teague R, Antalffy B, Armstrong D,  
3 Arancio O, Sweatt JD, Zoghbi HY (2006) Learning and memory and synaptic plasticity  
4 are impaired in a mouse model of Rett syndrome. *J Neurosci* 26: 319-27
- 5 Niwa H, Yamamura K, Miyazaki J (1991) Efficient selection for high-expression  
6 transfectants with a novel eukaryotic vector. *Gene* 108: 193-9
- 7 Nowak R, Woszczyński M, Siedlecki JA (1990) Changes in the DNA polymerase beta  
8 gene expression during development of lung, brain, and testis suggest an involvement of  
9 the enzyme in DNA recombination. *Exp Cell Res* 191: 51-6
- 10 Onishi K, Uyeda A, Shida M, Hirayama T, Yagi T, Yamamoto N, Sugo N (2017) Genome  
11 Stability by DNA Polymerase beta in Neural Progenitors Contributes to Neuronal  
12 Differentiation in Cortical Development. *J Neurosci* 37: 8444-8458
- 13 Poduri A, Evrony GD, Cai X, Walsh CA (2013) Somatic mutation, genomic variation,  
14 and neurological disease. *Science* 341: 1237758
- 15 Pulvers JN, Huttner WB (2009) Brca1 is required for embryonic development of the  
16 mouse cerebral cortex to normal size by preventing apoptosis of early neural progenitors.  
17 *Development* 136: 1859-68
- 18 Rao KS, Annapurna VV, Raji NS (2001) DNA polymerase-beta may be the main player  
19 for defective DNA repair in aging rat neurons. *Ann N Y Acad Sci* 928: 113-20
- 20 Rehen SK, Yung YC, McCreight MP, Kaushal D, Yang AH, Almeida BS, Kingsbury MA,  
21 Cabral KM, McConnell MJ, Anliker B, Fontanoz M, Chun J (2005) Constitutional  
22 aneuploidy in the normal human brain. *J Neurosci* 25: 2176-80
- 23 Rogakou EP, Boon C, Redon C, Bonner WM (1999) Megabase chromatin domains  
24 involved in DNA double-strand breaks in vivo. *J Cell Biol* 146: 905-16
- 25 Rogakou EP, Pilch DR, Orr AH, Ivanova VS, Bonner WM (1998) DNA double-stranded  
26 breaks induce histone H2AX phosphorylation on serine 139. *J Biol Chem* 273: 5858-68
- 27 Ross W, Rowe T, Glisson B, Yalowich J, Liu L (1984) Role of topoisomerase II in  
28 mediating epipodophyllotoxin-induced DNA cleavage. *Cancer Res* 44: 5857-60
- 29 Rudenko A, Dawlaty MM, Seo J, Cheng AW, Meng J, Le T, Faull KF, Jaenisch R, Tsai

- 1 LH (2013) Tet1 is critical for neuronal activity-regulated gene expression and memory  
2 extinction. *Neuron* 79: 1109-22
- 3 Sanosaka T, Imamura T, Hamazaki N, Chai M, Igarashi K, Ideta-Otsuka M, Miura F, Ito  
4 T, Fujii N, Ikeo K, Nakashima K (2017) DNA Methylome Analysis Identifies  
5 Transcription Factor-Based Epigenomic Signatures of Multilineage Competence in  
6 Neural Stem/Progenitor Cells. *Cell Rep* 20: 2992-3003
- 7 Schuermann D, Weber AR, Schar P (2016) Active DNA demethylation by DNA repair:  
8 Facts and uncertainties. *DNA Repair (Amst)* 44: 92-102
- 9 Schultz LB, Chehab NH, Malikzay A, Halazonetis TD (2000) p53 binding protein 1  
10 (53BP1) is an early participant in the cellular response to DNA double-strand breaks. *J*  
11 *Cell Biol* 151: 1381-90
- 12 Scorcioni R, Polavaram S, Ascoli GA (2008) L-Measure: a web-accessible tool for the  
13 analysis, comparison and search of digital reconstructions of neuronal morphologies. *Nat*  
14 *Protoc* 3: 866-76
- 15 Sharma A, Klein SS, Barboza L, Lohdi N, Toth M (2016) Principles Governing DNA  
16 Methylation during Neuronal Lineage and Subtype Specification. *J Neurosci* 36: 1711-  
17 22
- 18 Shoji H, Irino Y, Yoshida M, Miyakawa T (2018) Behavioral effects of long-term oral  
19 administration of aluminum ammonium sulfate in male and female C57BL/6J mice.  
20 *Neuropsychopharmacol Rep* 38: 18-36
- 21 Simmons RK, Stringfellow SA, Glover ME, Wagle AA, Clinton SM (2013) DNA  
22 methylation markers in the postnatal developing rat brain. *Brain Res* 1533: 26-36
- 23 Sobol RW, Horton JK, Kuhn R, Gu H, Singhal RK, Prasad R, Rajewsky K, Wilson SH  
24 (1996) Requirement of mammalian DNA polymerase-beta in base-excision repair. *Nature*  
25 379: 183-6
- 26 Stroud H, Su SC, Hrvatin S, Greben AW, Renthall W, Boxer LD, Nagy MA, Hochbaum  
27 DR, Kinde B, Gabel HW, Greenberg ME (2017) Early-Life Gene Expression in Neurons  
28 Modulates Lasting Epigenetic States. *Cell* 171: 1151-1164.e16
- 29 Sugo N, Aratani Y, Nagashima Y, Kubota Y, Koyama H (2000) Neonatal lethality with  
30 abnormal neurogenesis in mice deficient in DNA polymerase beta. *EMBO J* 19: 1397-



- 1 404
- 2 Sugo N, Niimi N, Aratani Y, Masutani M, Suzuki H, Koyama H (2007) Decreased PARP-  
3 1 levels accelerate embryonic lethality but attenuate neuronal apoptosis in DNA  
4 polymerase beta-deficient mice. *Biochem Biophys Res Commun* 354: 656-61
- 5 Sugo N, Niimi N, Aratani Y, Takiguchi-Hayashi K, Koyama H (2004) p53 Deficiency  
6 rescues neuronal apoptosis but not differentiation in DNA polymerase beta-deficient mice.  
7 *Mol Cell Biol* 24: 9470-7
- 8 Sykora P, Misiak M, Wang Y, Ghosh S, Leandro GS, Liu D, Tian J, Baptiste BA, Cong  
9 WN, Brennerman BM, Fang E, Becker KG, Hamilton RJ, Chigurupati S, Zhang Y, Egan  
10 JM, Croteau DL, Wilson DM, 3rd, Mattson MP, Bohr VA (2015) DNA polymerase beta  
11 deficiency leads to neurodegeneration and exacerbates Alzheimer disease phenotypes.  
12 *Nucleic Acids Res* 43: 943-59
- 13 Tabata H, Nakajima K (2001) Efficient in utero gene transfer system to the developing  
14 mouse brain using electroporation: visualization of neuronal migration in the developing  
15 cortex. *Neuroscience* 103: 865-72
- 16 Tahiliani M, Koh KP, Shen Y, Pastor WA, Bandukwala H, Brudno Y, Agarwal S, Iyer LM,  
17 Liu DR, Aravind L, Rao A (2009) Conversion of 5-Methylcytosine to 5-  
18 Hydroxymethylcytosine in Mammalian DNA by MLL Partner TET1. *Science* 324: 930-  
19 5
- 20 Tomita K, Kubo K, Ishii K, Nakajima K (2011) Disrupted-in-Schizophrenia-1 (Disc1) is  
21 necessary for migration of the pyramidal neurons during mouse hippocampal  
22 development. *Hum Mol Genet* 20: 2834-45
- 23 Weber AR, Krawczyk C, Robertson AB, Kuśnierczyk A, Vågbø CB, Schuermann D,  
24 Klungland A, Schär P (2016) Biochemical reconstitution of TET1-TDG-BER-dependent  
25 active DNA demethylation reveals a highly coordinated mechanism. *Nature*  
26 *Communications* 7
- 27 Wei PC, Chang AN, Kao J, Du Z, Meyers RM, Alt FW, Schwer B (2016) Long Neural  
28 Genes Harbor Recurrent DNA Break Clusters in Neural Stem/Progenitor Cells. *Cell* 164:  
29 644-55
- 30 Williams JT, Christie MJ, Manzoni O (2001) Cellular and synaptic adaptations mediating  
31 opioid dependence. *Physiol Rev* 81: 299-343

- 1 Wilson DM, 3rd, McNeill DR (2007) Base excision repair and the central nervous system.  
2 *Neuroscience* 145: 1187-200
- 3 Wilson SH, Sobol RW, Beard WA, Horton JK, Prasad R, Berg BJV (2000) DNA  
4 Polymerase  $\beta$  and Mammalian Base Excision Repair.
- 5 Wu SC, Zhang Y (2010) Active DNA demethylation: many roads lead to Rome. *Nat Rev*  
6 *Mol Cell Biol* 11: 607-20
- 7 Wu X, Zhang Y (2017) TET-mediated active DNA demethylation: mechanism, function  
8 and beyond. *Nat Rev Genet* 18: 517-534
- 9 Yu H, Su Y, Shin J, Zhong C, Guo JU, Weng YL, Gao F, Geschwind DH, Coppola G,  
10 Ming GL, Song H (2015) Tet3 regulates synaptic transmission and homeostatic plasticity  
11 via DNA oxidation and repair. *Nat Neurosci* 18: 836-43
- 12 Zhou Z, Hong EJ, Cohen S, Zhao WN, Ho HY, Schmidt L, Chen WG, Lin Y, Savner E,  
13 Griffith EC, Hu L, Steen JA, Weitz CJ, Greenberg ME (2006) Brain-specific  
14 phosphorylation of MeCP2 regulates activity-dependent Bdnf transcription, dendritic  
15 growth, and spine maturation. *Neuron* 52: 255-69
- 16 Zhu X, Girardo D, Govek EE, John K, Mellen M, Tamayo P, Mesirov JP, Hatten ME  
17 (2016) Role of Tet1/3 Genes and Chromatin Remodeling Genes in Cerebellar Circuit  
18 Formation. *Neuron* 89: 100-12
- 19

## 1 Figures and Figure Legends

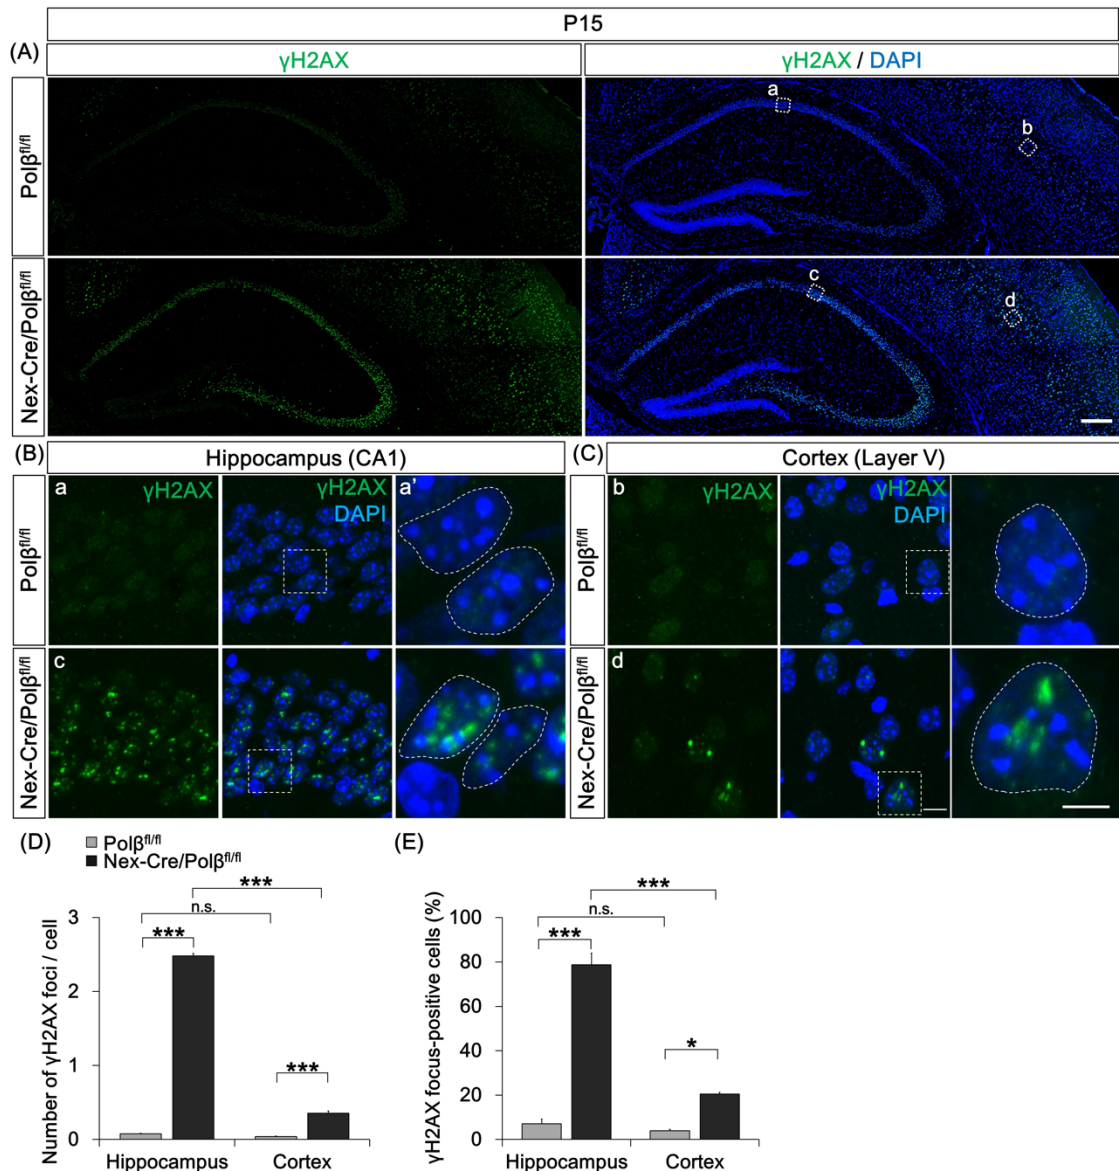

## 2 Fig. 1 *Nex-Cre/Polβ<sup>fl/fl</sup>* mice exhibit DSBs in postnatal hippocampus and cortex.

3 (A) Immunohistochemistry was performed with anti- $\gamma$ H2AX antibody in P15 *Nex-*  
4 *Cre/Polβ<sup>fl/fl</sup>* and *Polβ<sup>fl/fl</sup>* hippocampus and cortex. Scale bar, 400  $\mu$ m. (B, C) Magnified  
5 images of the boxed areas in (A) including hippocampal CA1 pyramidal cell layer (a, c)  
6 and cortical layer V (b, d) are shown. Magnified images of the dashed-line boxed areas  
7 in the center image are shown in the the rightmost images. The dashed lines in the  
8 rightmost images mark the perimeter of the nucleus. Scale bars, 10 (the center) and 5  $\mu$ m

1 (the right). (D, E) Histograms show quantitative analysis of the mean number of  $\gamma$ H2AX  
2 foci in each nucleus (D) and percentage of  $\gamma$ H2AX foci-positive cells (E) in hippocampus  
3 and cortex of *Nes-Cre/Pol $\beta^{fl/fl}$*  (n = 492 cells, n = 666 cells) and *Pol $\beta^{fl/fl}$*  (n = 513 cells, n  
4 = 791 cells) mice. Data are the mean  $\pm$  SEM from three different brains. Significant  
5 difference: \*p < 0.05 and \*\*\*p < 0.001, ANOVA with Tukey's post-hoc test.  
6

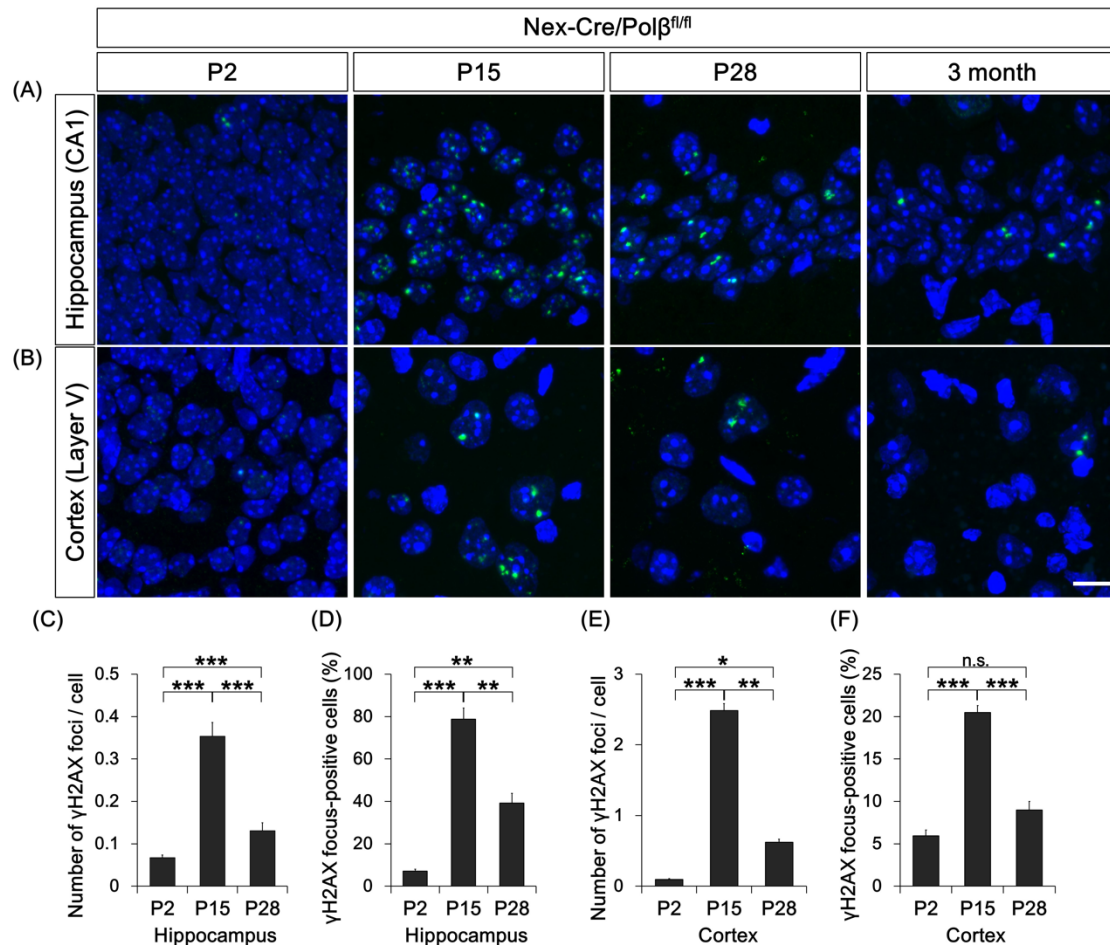

1 **Fig. 2 DSB formation in *Nex-Cre/Polβ<sup>fl/fl</sup>* mice transiently increases during postnatal**  
 2 **development.**

3 (A, B) Immunohistochemistry was performed with anti-γH2AX antibody in *Nex-*  
 4 *Cre/Polβ<sup>fl/fl</sup>* and *Polβ<sup>fl/fl</sup>* hippocampus (A) and cortex (B) at P2, P15, P28, and 3 months.  
 5 Scale bar, 10 μm. (C-F) Histograms show quantitative analysis of the mean number of  
 6 γH2AX foci in each nucleus (C, E) and γH2AX foci-positive cells (D, F) in hippocampus  
 7 (C, D) and cortex (E, F) of *Nex-Cre/Polβ<sup>fl/fl</sup>* mice at P2 (n = 1160 cells, n = 2155 cells),  
 8 P15 (n = 492 cells, n = 690 cells), and P28 (n = 477 cells, n = 620 cells). Data are the  
 9 mean ± SEM from three independent experiments. Significant difference: \*p < 0.05, \*\*p  
 10 < 0.01, and \*\*\*p < 0.001, ANOVA with Tukey's post-hoc test.

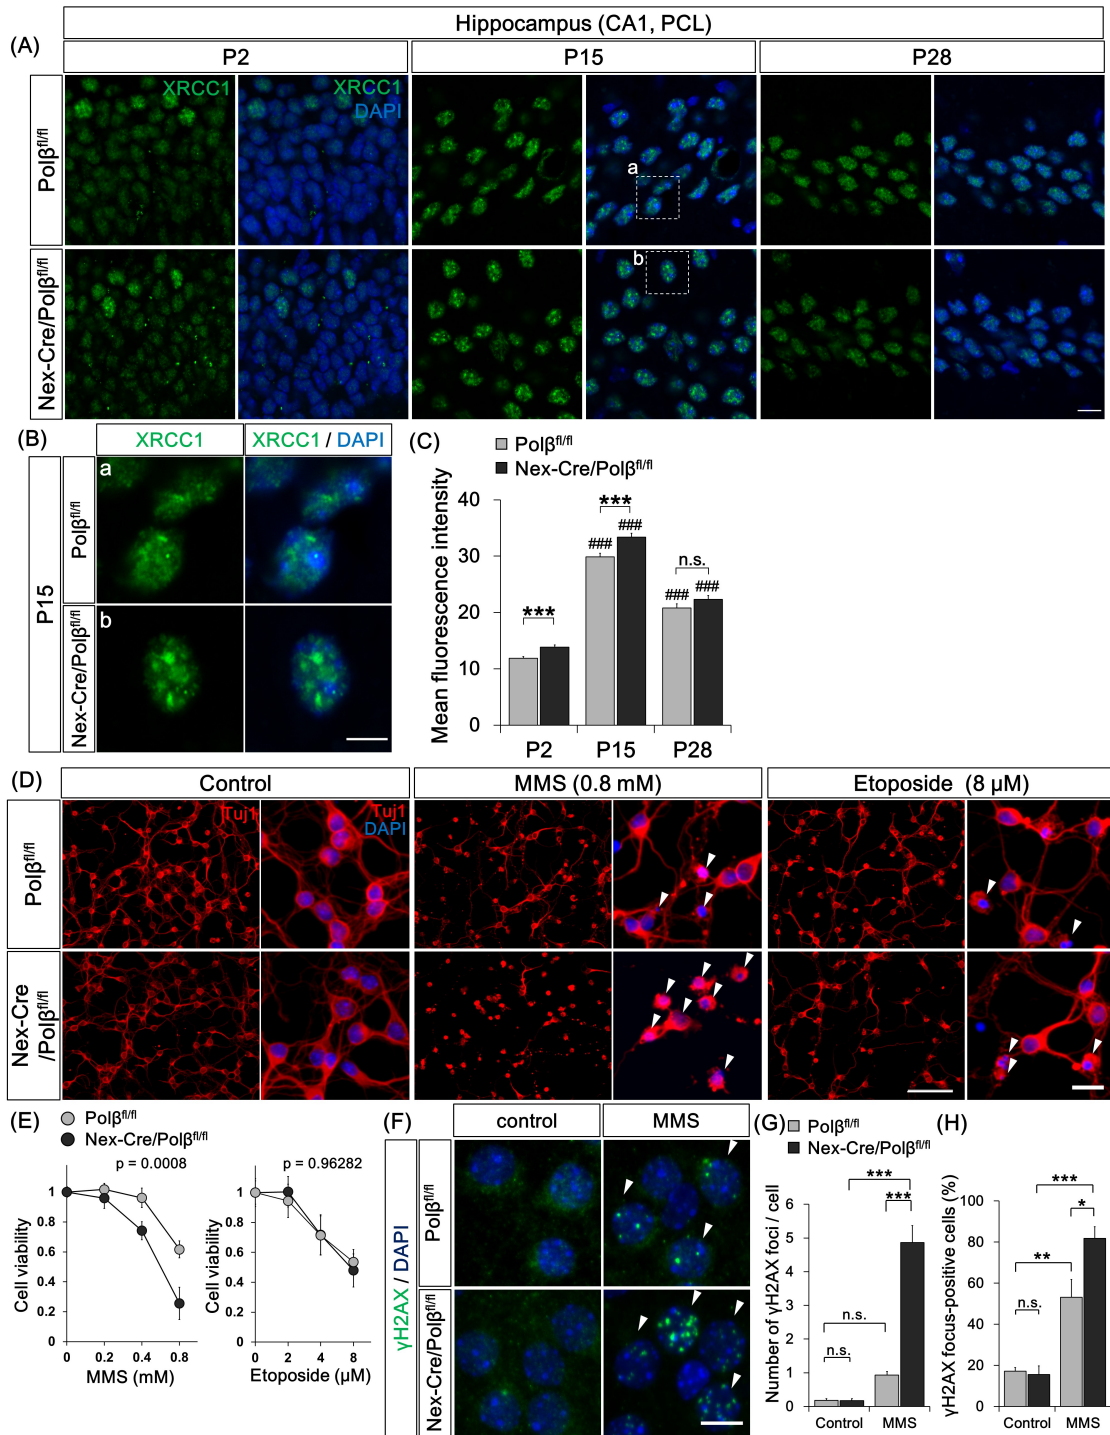

1 **Fig. 3 Polβ is required for SSB repair in postmitotic neurons.**

2 (A) Immunohistochemistry was performed with anti-XRCC1 antibody in CA1 pyramidal  
 3 cell layers of *Nex-Cre/Polβ<sup>fl/fl</sup>* and *Polβ<sup>fl/fl</sup>* hippocampus at P2, P15, and P28. Scale bar,  
 4 10 μm. (B) Magnified images of the boxed areas in (A) are shown. Scale bar, 5 μm. (C)  
 5 Histogram shows the mean XRCC1 fluorescence intensity in DAPI-stained nuclei of *Nex-*

1 *Cre/Polβ<sup>fl/fl</sup>* (n = 576, 295, and 234 cells) and *Polβ<sup>fl/fl</sup>* (n = 643, 282, and 256 cells)  
2 hippocampal CA1 cells at P2, P15, and P28. Data are the mean ± SEM. Significant  
3 difference from *Polβ<sup>fl/fl</sup>* mice: \*\*\*p < 0.001, ANOVA with Tukey's post-hoc test.  
4 Significant difference between age groups: ###p < 0.001, ANOVA with Tukey's post-hoc  
5 test. (D) Primary cultured neurons from E16.5 *Nex-Cre/Polβ<sup>fl/fl</sup>* or *Polβ<sup>fl/fl</sup>* cortex were  
6 treated with MMS or etoposide for 1 h at 3–4 days *in vitro* (DIV), and fixed after 24 h  
7 recovery. Immunocytochemistry was then performed with anti-Tuj1 antibody.  
8 Arrowheads indicate dying pyknotic cells. Magnified images are shown in the right  
9 panels. Scale bars, 100 and 20 μm. (E) Quantitative analysis of cell viability of *Nex-*  
10 *Cre/Polβ<sup>fl/fl</sup>* and *Polβ<sup>fl/fl</sup>* cortical neurons treated with MMS or etoposide for 1 h. Data are  
11 mean ± SEM from three independent experiments. Significant difference: p-values  
12 (repeated measures ANOVA) are indicated. (F) Primary cultured neurons from E16.5  
13 *Nex-Cre/Polβ<sup>fl/fl</sup>* or *Polβ<sup>fl/fl</sup>* cortex were treated with MMS for 1 h at 14 DIV and  
14 immunocytochemistry was performed with anti-γH2AX antibody. Arrowheads indicate  
15 γH2AX focus-positive cells. (G, H) Histograms show quantitative analysis of the mean  
16 number of γH2AX foci in each nucleus (G) and the percentage of γH2AX focus-positive  
17 cells (H). Data are mean ± SEM from control or MMS-treated *Nex-Cre/Polβ<sup>fl/fl</sup>* (n = 79  
18 cells, n = 80 cells) and *Polβ<sup>fl/fl</sup>* (n = 71 cells, n = 86 cells) neurons in three independent  
19 experiments. Significant difference: \*p < 0.05, \*\*p < 0.01, and \*\*\*p < 0.001, ANOVA  
20 with Tukey's post-hoc test.  
21

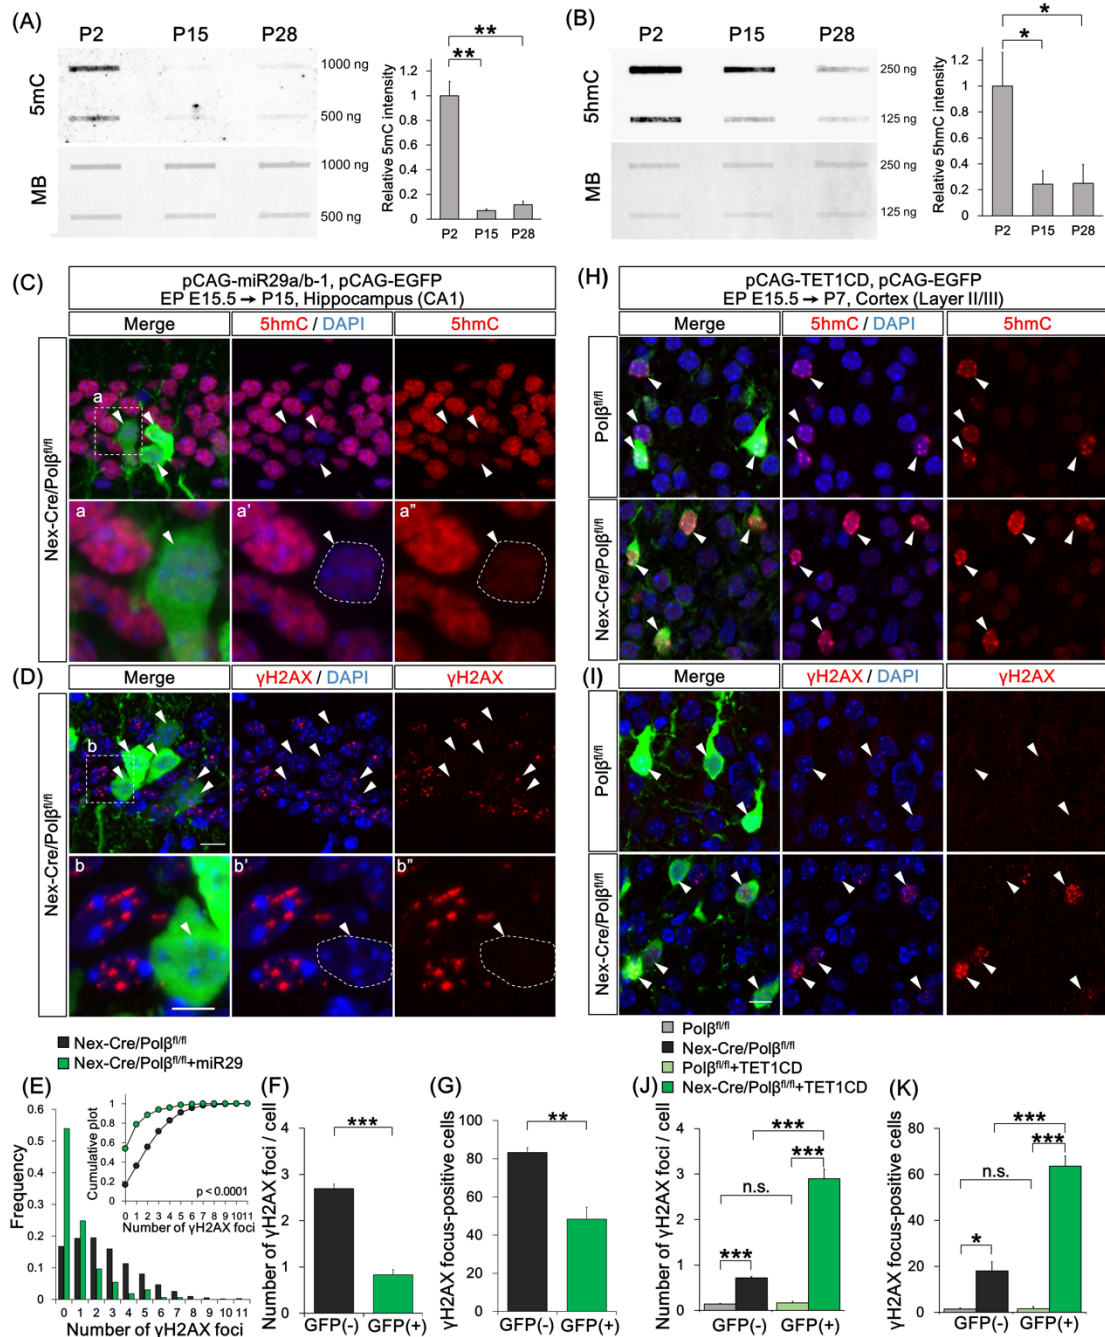

1 **Fig. 4 Loss of Polβ in active DNA demethylation causes DSBs in neurons.**

2 (A, B) Immunoblot analyses show amounts of 5mC (A) and 5hmC (B) in genomic DNA  
 3 from P2, P15, and P28 *Polβ<sup>fl/fl</sup>* hippocampus. The membranes were also stained with  
 4 methylene blue (MB) as a loading control. The relative intensity of 5mC and 5hmC was  
 5 quantified. Data are mean ± SEM from three different brains. Significant difference: \*p  
 6 < 0.05 and \*\*p < 0.01, ANOVA with Tukey's post-hoc test. (C–G) Hippocampal CA1



1 neurons were cotransfected with pCAG-miR29a/b-1 and pCAG-EGFP by *in utero*  
2 electroporation at E15.5 and analyzed at P15. Immunohistochemistry was performed with  
3 anti-5hmC (C),  $\gamma$ H2AX (D), and -GFP antibodies in *Nex-Cre/Pol $\beta^{fl/fl}$*  hippocampus. (C,  
4 D) Magnified images of the dashed-line boxed areas in the upper image are shown in the  
5 the lower images. The dashed lines in the lower images mark the perimeter of the nucleus.  
6 Arrowheads indicate EGFP-positive transfected cells. Scale bars, 10 (the upper) and 5  
7 (the lower)  $\mu$ m. (E) Distribution histogram shows the number of  $\gamma$ H2AX foci in the  
8 transfected (GFP(+), n = 137 cells) and the surrounding untransfected (GFP(-), n = 522  
9 cells) nuclei of *Nex-Cre/Pol $\beta^{fl/fl}$*  hippocampus. The Kolmogorov-Smirnov (KS) test  
10 shows the significant difference between GFP(-) and GFP(+) cells. (F, G) Histograms  
11 show the average number of  $\gamma$ H2AX foci (F) and percentage of focus-positive cells (G)  
12 in the GFP(+) and the surrounding GFP(-) nuclei of *Nex-Cre/Pol $\beta^{fl/fl}$*  CA1 cells. Data are  
13 the mean  $\pm$  SEM from three different brains. Significant difference: \*\*p < 0.01 and \*\*\*p  
14 < 0.001, Student's t-test. (H–K) Cortical upper layer neurons were cotransfected with  
15 pCAG-TET1CD and pCAG-EGFP by *in utero* electroporation at E15.5 and analyzed at  
16 P7. Immunohistochemistry was performed with anti-5hmC (H),  $\gamma$ H2AX (I) and -GFP  
17 antibodies in *Nex-Cre/Pol $\beta^{fl/fl}$*  and *Pol $\beta^{fl/fl}$*  cortex. Arrowheads indicate EGFP-positive  
18 transfected cells. Scale bar, 10  $\mu$ m. (J, K) Histograms show the average number of  $\gamma$ H2AX  
19 foci (J) or percentage of focus-positive cells (K) in the GFP(+) and surrounding GFP(-)  
20 nuclei of *Nex-Cre/Pol $\beta^{fl/fl}$*  (n = 160 cells, n = 950 cells) and *Pol $\beta^{fl/fl}$*  (n = 161 cells and n =  
21 966 cells) cortex. Data are the mean  $\pm$  SEM from three different brains. Significant  
22 difference: \*p < 0.05, \*\*p < 0.01, and \*\*\*p < 0.001, ANOVA with Tukey's post-hoc test.

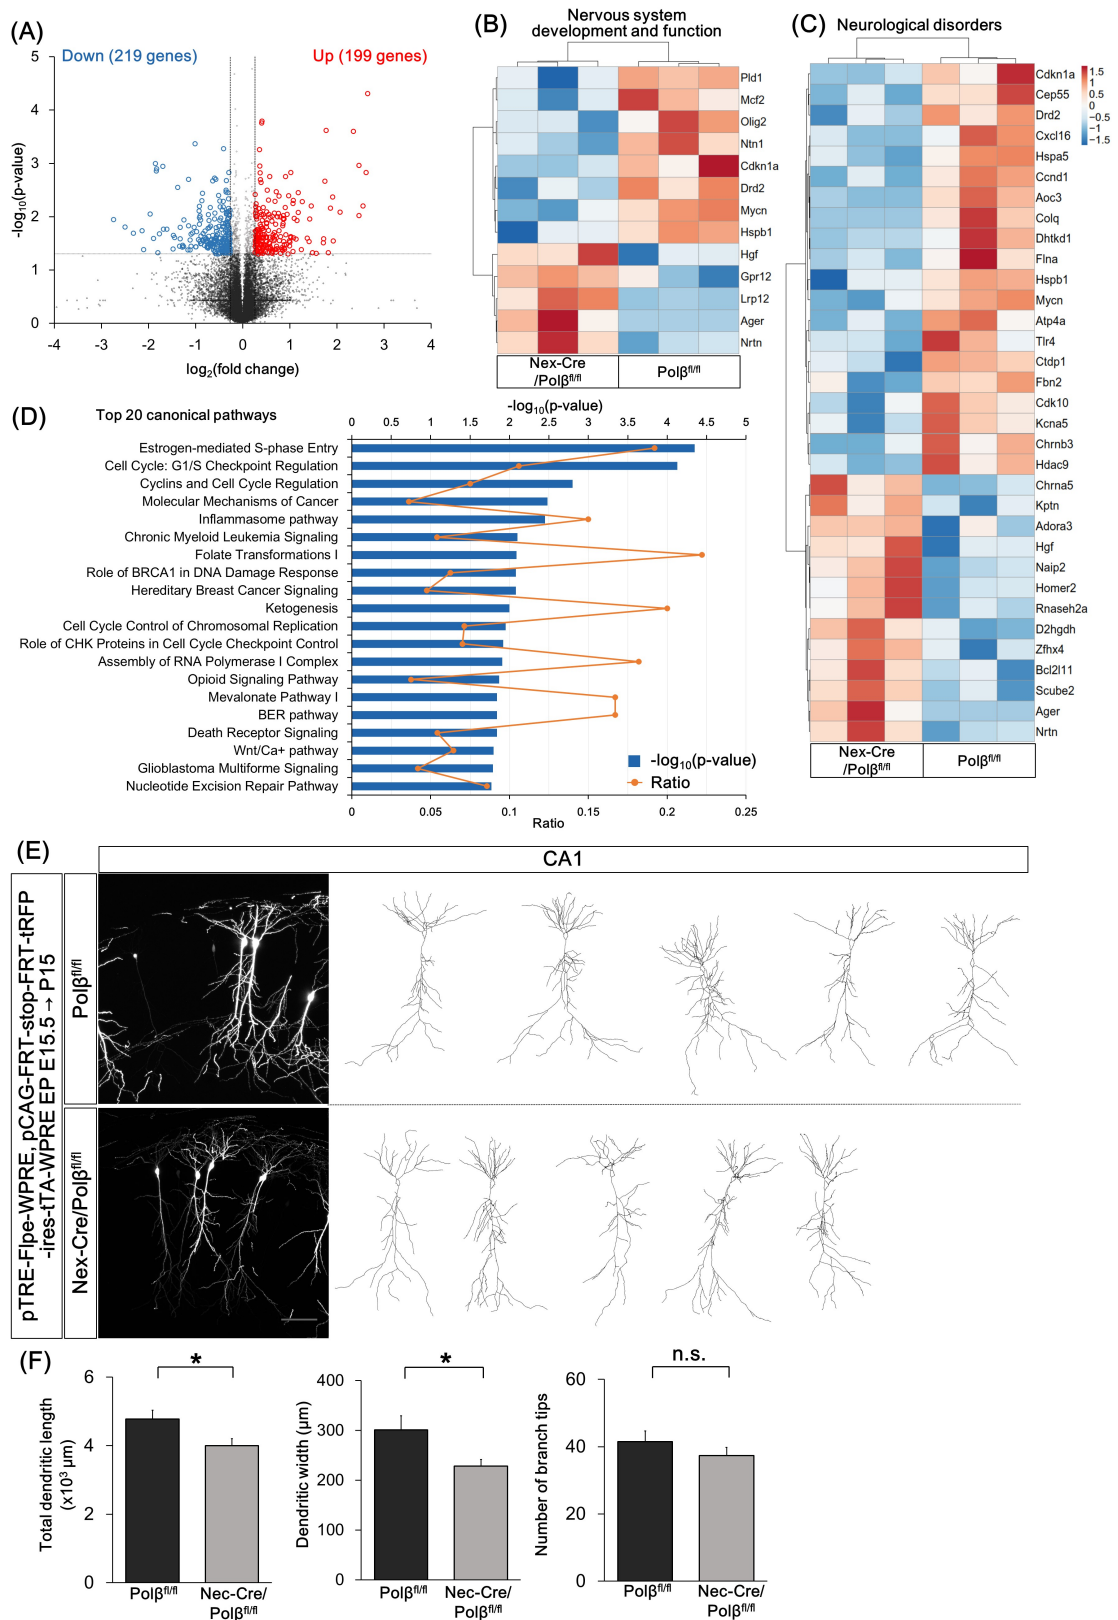

1 **Fig. 5** *Polβ* deficiency affects gene expression and dendrite morphology of

1 **hippocampal neurons during postnatal development.**

2 (A) Volcano plot of RNA-seq data from *Polβ<sup>fl/fl</sup>* and *Nex-Cre/Polβ<sup>fl/fl</sup>* P15 hippocampus (n  
3 = 3). Differentially expressed genes (DEGs, *Nex-Cre/Polβ<sup>fl/fl</sup>* vs *Polβ<sup>fl/fl</sup>*,  $p < 0.05$ , fold  
4 change  $> 1.2$ ) are highlighted in blue (down) or red (up). (B, C) Hierarchical clustering  
5 with mean-centered  $\log_2$ -FPKM of DEGs related to nervous system development and  
6 function (B) or neurological disorders (C). Rows and columns represent genes and  
7 samples, respectively. (D) Top 20 canonical pathways predicted by Ingenuity Pathway  
8 Analysis. (E) Hippocampal CA1 neurons were cotransfected with FLPe-based Supernova  
9 vectors by *in utero* electroporation at E15.5 and analyzed at P15. Immunohistochemistry  
10 was performed with anti-tRFP antibody in *Nex-Cre/Polβ<sup>fl/fl</sup>* and *Polβ<sup>fl/fl</sup>* hippocampus.  
11 Examples of z-projected dendritic morphology of CA1 neurons traced with tRFP labeling  
12 are shown. Scale bar, 100  $\mu\text{m}$ . (F) Quantitative analysis for total dendritic length,  
13 dendritic width, and number of branch tips. Data are mean  $\pm$  SEM from *Polβ<sup>fl/fl</sup>* (n = 18  
14 cells of 5 animals) and *Nex-Cre/Polβ<sup>fl/fl</sup>* (n = 20 cells of 4 animals) mice. Significant  
15 difference: \* $p < 0.05$ , ANOVA.

16

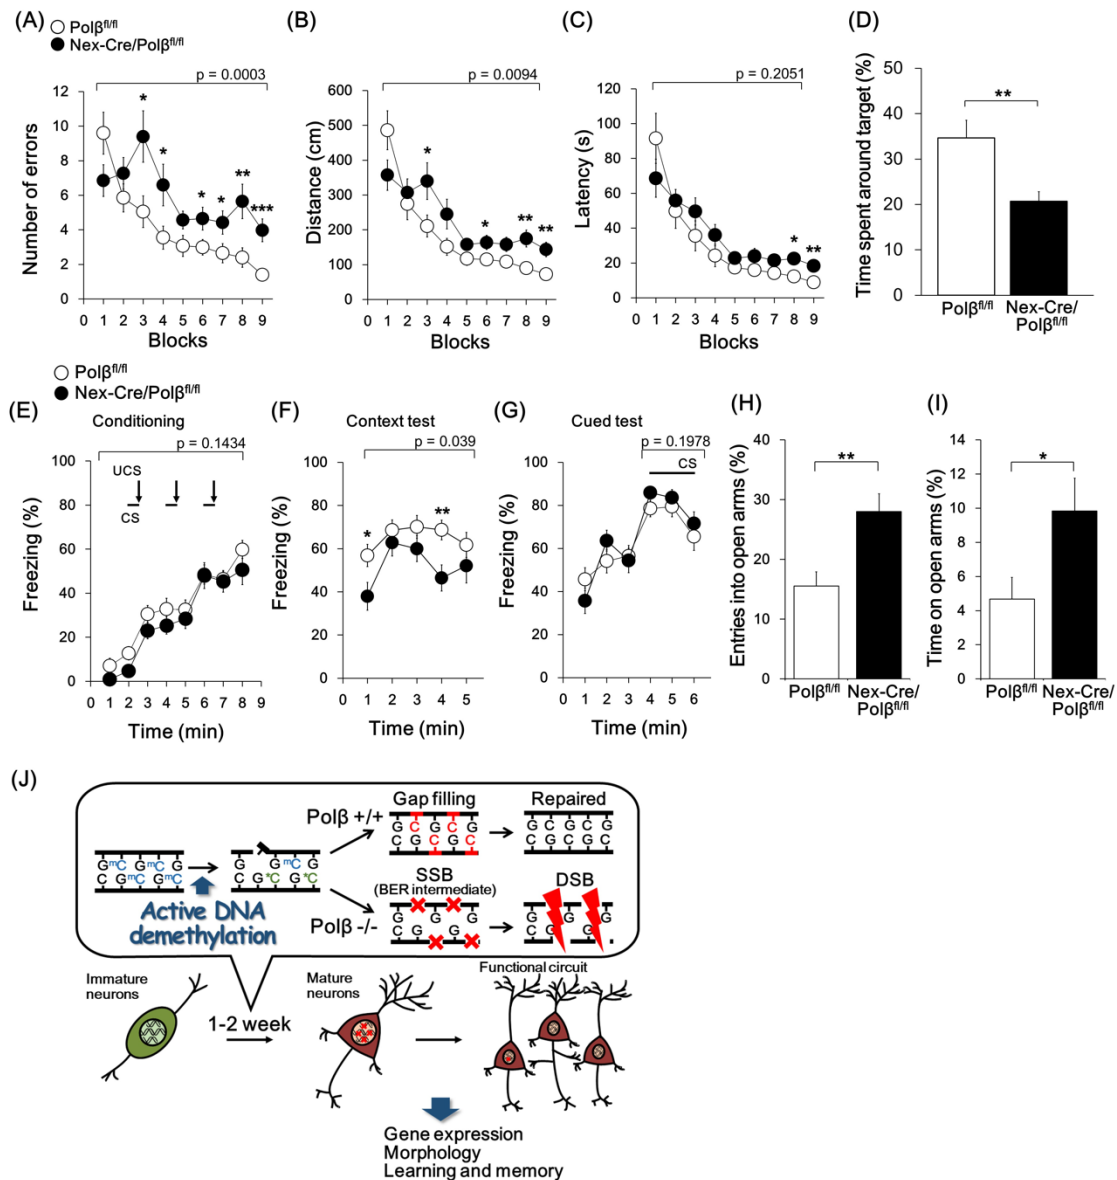

1 **Fig. 6 *Nex-Cre/Polβ<sup>fl/fl</sup>* mice show impaired spatial reference memory and contextual**  
 2 **fear memory.**

3 (A–D) The Barnes maze test was performed for *Nex-Cre/Polβ<sup>fl/fl</sup>* ( $n = 20$ ) and *Polβ<sup>fl/fl</sup>* ( $n$   
 4  $= 20$ ) mice. Quantitative analysis of the number of errors (A), distance traveled (B), and  
 5 latency (C) before reaching the target hole. Data are mean  $\pm$  SEM. Significant differences:  
 6  $p$ -values of repeated measures ANOVA are indicated. \* $p < 0.05$ , \*\* $p < 0.01$ , and \*\*\* $p <$   
 7  $0.001$ , ANOVA for 2 blocks of trials. (D) Histogram shows percentage of time spent  
 8 around the target in the probe test at one day after the acquisition test. Data is mean  $\pm$   
 9 SEM. Significant differences: \*\* $p < 0.01$ , ANOVA. (E–G) Quantitative analysis of

1 freezing behavior (%) in the conditioning session (E), contextual (F) and cued (G) test in  
2 the fear conditioning test. Data is mean  $\pm$  SEM from *Nex-Cre/Pol $\beta$ <sup>fl/fl</sup>* (n = 20) and *Pol $\beta$ <sup>fl/fl</sup>*  
3 (n = 20) mice. Significant differences: p-values of repeated measures ANOVA are  
4 indicated. \*p < 0.05, \*\*p < 0.01, ANOVA for each duration. (H, I) Histograms show  
5 quantitative analysis of entries into open arms (H) and time spent in open arms (I) in the  
6 elevated plus maze test. Data are mean  $\pm$  SEM from *Nex-Cre/Pol $\beta$ <sup>fl/fl</sup>* (n = 20) and *Pol $\beta$ <sup>fl/fl</sup>*  
7 (n = 20) mice. Significant difference, \*p < 0.05, \*\*p < 0.01, ANOVA. (J) Proposed model  
8 of Pol $\beta$ -dependent active DNA demethylation during postnatal neuronal development.

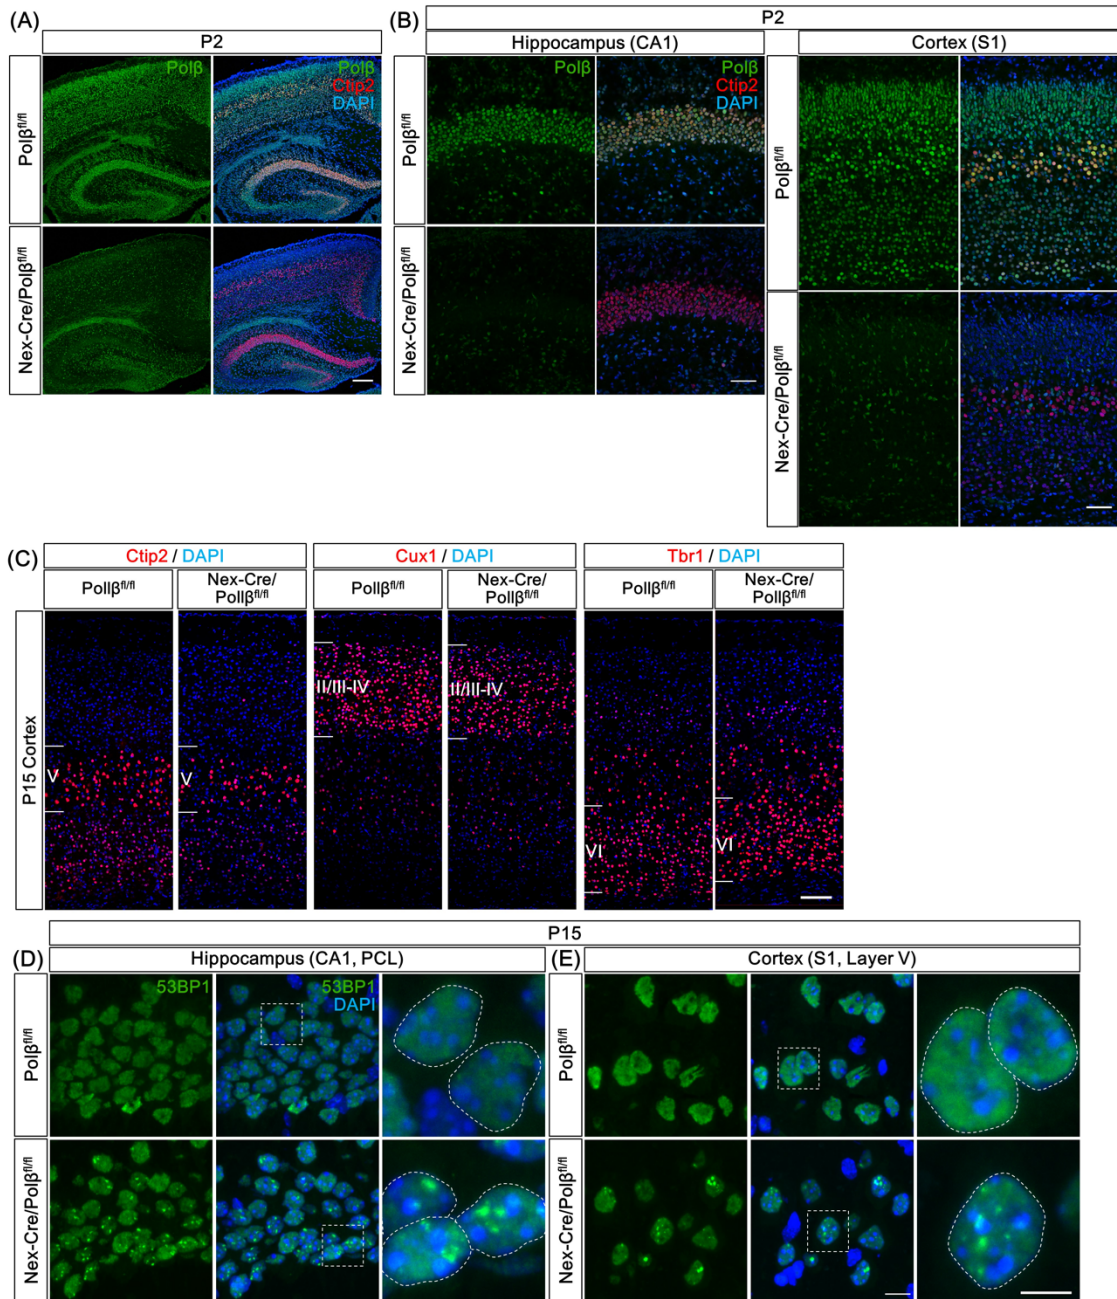

1 **Supplemental Fig. 1  $Nex-Cre/Pol\beta^{fl/fl}$  mice exhibit DSB formation in postnatal**  
 2 **hippocampus and cortex.**

3 (A) Immunohistochemistry was performed with anti- $Pol\beta$  and - $Ctip2$  antibodies in P2  
 4  $Nex-Cre/Pol\beta^{fl/fl}$  and control  $Pol\beta^{fl/fl}$  cortex and hippocampus. Scale bar, 400  $\mu$ m. (B)  
 5 Magnified images are hippocampal CA1 area and somatosensory area 1 (S1) in the cortex.  
 6 Scale bar, 100  $\mu$ m. (C) Immunohistochemistry was performed with anti- $Ctip2$ , - $Cux1$ ,  
 7 and - $Tbr1$  antibodies in P15  $Nex-Cre/Pol\beta^{fl/fl}$  and  $Pol\beta^{fl/fl}$  cortex. Scale bar, 200  $\mu$ m. (D)

1 Immunohistochemistry was performed with anti-53BP1 antibody in P15 *Nex-Cre/Polβ<sup>fl/fl</sup>*  
2 and *Polβ<sup>fl/fl</sup>* cortex and hippocampus. Magnified images of the boxed areas are shown in  
3 the right panels. The dashed lines in the rightmost images mark the perimeter of the  
4 nucleus. Scale bars, 10 (the center) and 5 (the right) μm.  
5

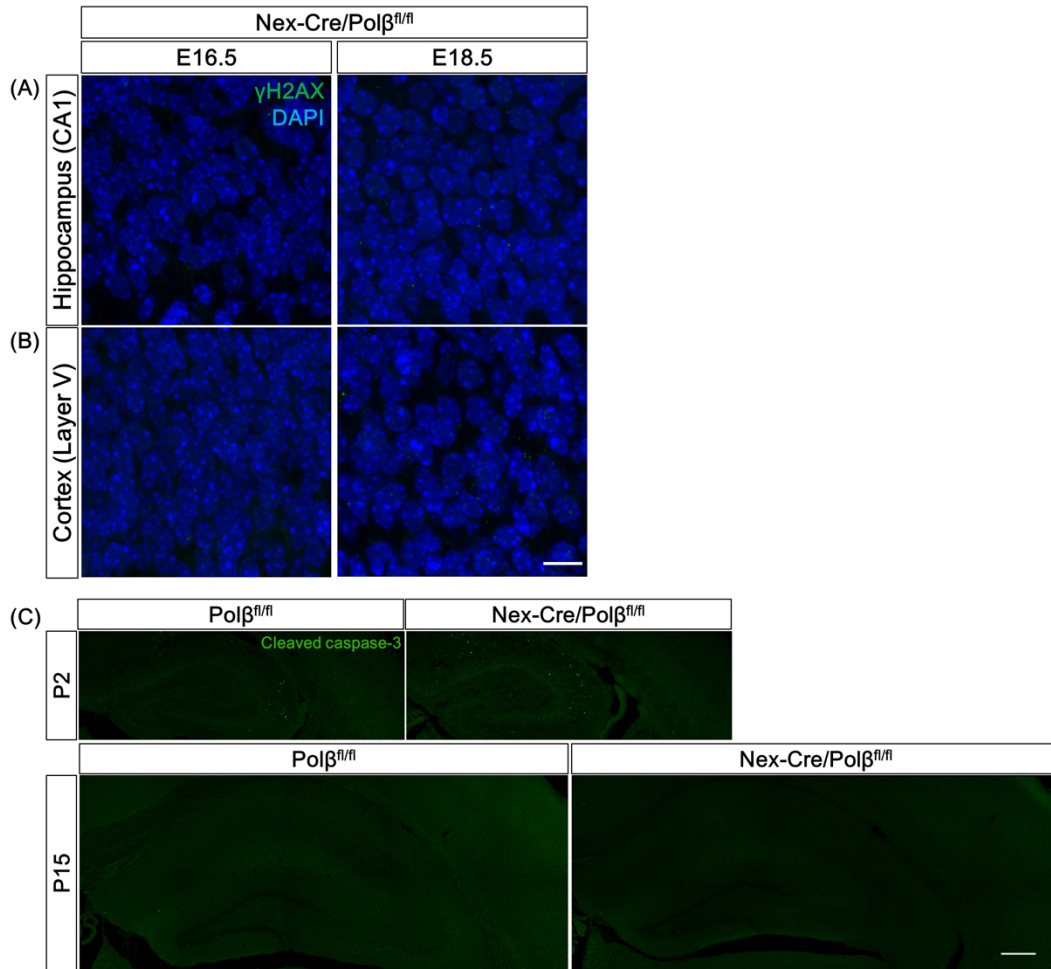

1 **Supplemental Fig. 2 *Nex-Cre/Polβ<sup>fl/fl</sup>* mice exhibit the extent of apoptotic cells similar**  
2 **to that control hippocampus and cortex.**

3 (A, B) Immunohistochemistry was performed with anti-γH2AX antibody in *Nex-*  
4 *Cre/Polβ<sup>fl/fl</sup>* and *Polβ<sup>fl/fl</sup>* hippocampus (A) and cortex (B) at E16.5 and E18.5. Scale bar,  
5 10 μm. (C) Immunohistochemistry was performed with anti-cleaved caspase 3 antibody  
6 in *Nex-Cre/Polβ<sup>fl/fl</sup>* and *Polβ<sup>fl/fl</sup>* hippocampus and cortex at P2 and P15. Scale bar, 400 μm.  
7



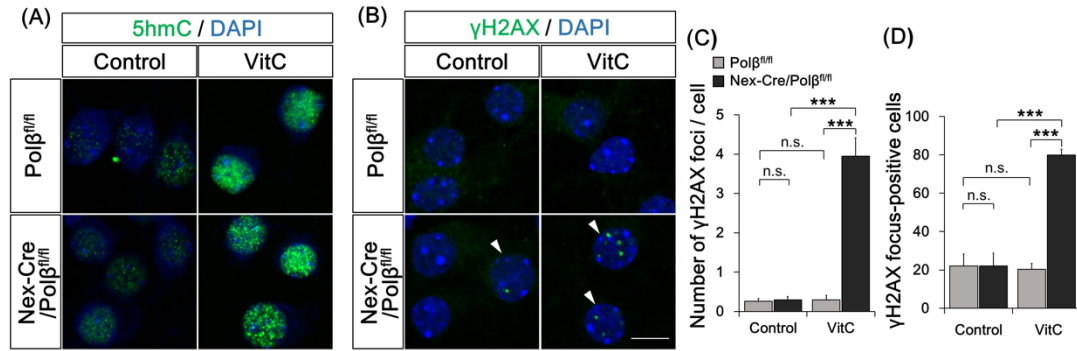

1 **Supplemental Fig. 3 Loss of Polβ in active DNA demethylation causes DSBs in**  
2 **neurons.**

3 (A, B) Primary cultured neurons from E16.5 *Nex-Cre/Polβ<sup>fl/fl</sup>* or *Polβ<sup>fl/fl</sup>* cortex were  
4 treated with vitamin C (VitC) for 24 h at 14 DIV and immunocytochemistry was  
5 performed with anti-5hmC (A) or anti-γH2AX (B) antibodies. Arrowheads indicate  
6 γH2AX focus-positive cells. (C, D) Histograms show the mean number of γH2AX foci  
7 in each nucleus (C) and the percentage of γH2AX focus-positive cells. Data are the mean  
8 ± SEM from control or VitC-treated *Nex-Cre/Polβ<sup>fl/fl</sup>* (n = 48 cells, n = 62 cells) and  
9 *Polβ<sup>fl/fl</sup>* (n = 54 cells, n = 49 cells) cortical neurons in three independent experiments.  
10 Significant difference: \*\*\*p < 0.001, ANOVA with Tukey's post-hoc test.  
11

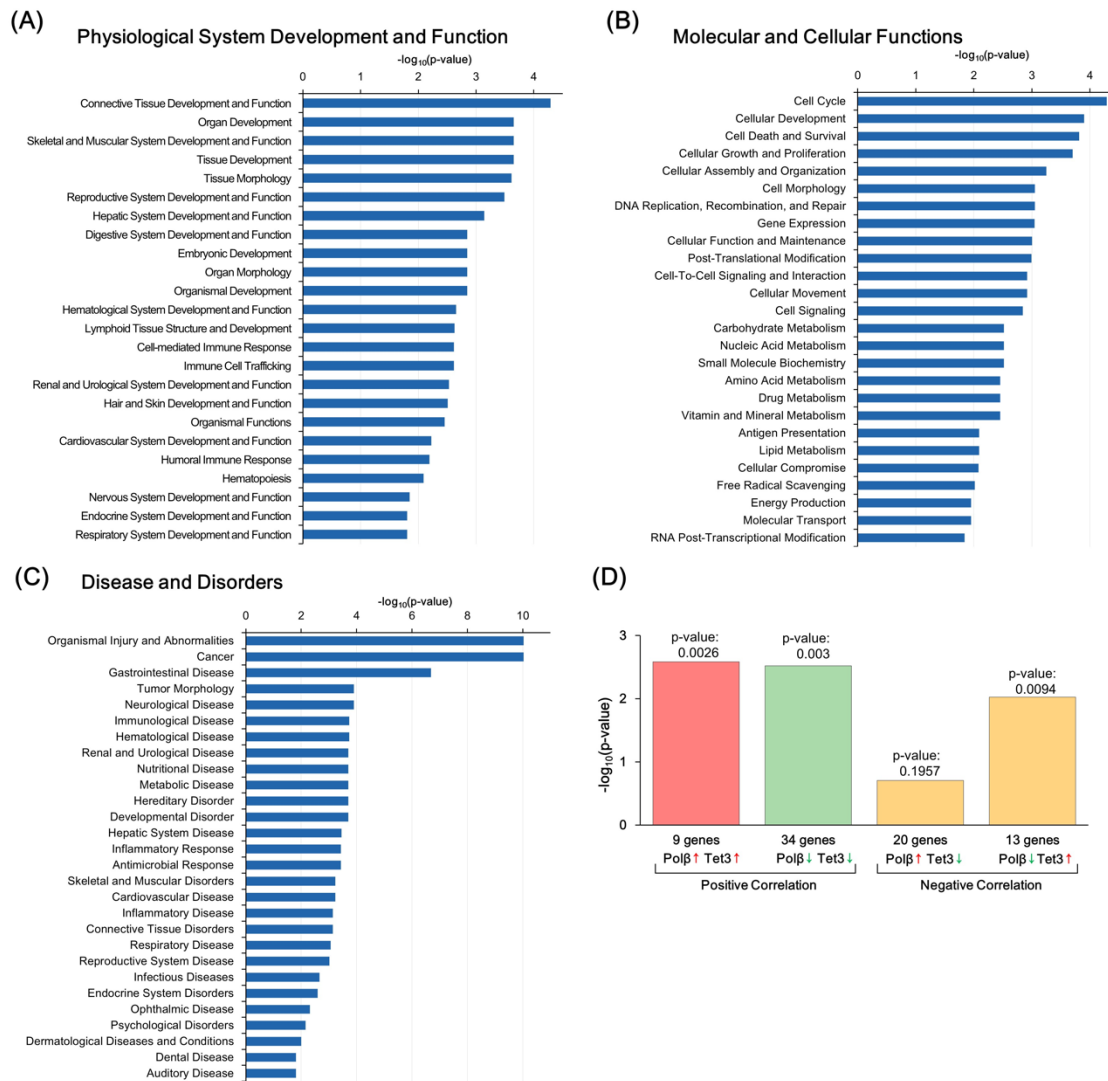

1 **Supplemental Fig. 4 Polβ deficiency affects gene expression and dendrite**  
 2 **morphology of hippocampus neurons during postnatal development.**

3 (A–C) Functional annotation of DEGs between *Nex-Cre/Polβ<sup>fl/fl</sup>* and *Polβ<sup>fl/fl</sup>* hippocampus  
 4 in the three primary categories by IPA ( $p < 0.05$ , Fisher's exact test): Physiological System  
 5 Development and Function (A), Molecular and Cellular Functions (B), and Disease and  
 6 Disorders (C). (D) Comparative analysis of DEGs between Polβ-deficient hippocampus  
 7 and TET3 shRNA-transfected hippocampal neuronal culture.

8

1

**Supplemental Table 1.** Summary of comprehensive behavioral test battery

| Test                                          | Measure                                  | p-value                                  |
|-----------------------------------------------|------------------------------------------|------------------------------------------|
| <b>General Health</b>                         |                                          |                                          |
| Body weight                                   | Weight (g)                               | 0.3496                                   |
| Body temperature                              | Temperature (°C)                         | 0.5477                                   |
| Grip strength                                 | Strength (N)                             | 0.8528                                   |
| Wire hang                                     | Latency to fall (sec)                    | 0.4578                                   |
| <b>Light/dark transition test</b>             |                                          |                                          |
|                                               | Stay time in light (sec)                 | 0.8748                                   |
|                                               | Number of transitions                    | 0.8044                                   |
|                                               | Latency to light (sec)                   | 0.4936                                   |
| <b>Open field test</b>                        |                                          |                                          |
|                                               | Total distance (cm)                      | G: 0.9697, G × T: < 0.0001***            |
|                                               | Vertical activity                        | G: 0.4896, G × T: 0.898                  |
|                                               | Center time (sec)                        | G: 0.8841, G × T: 0.9607                 |
|                                               | Stereotypic counts                       | G: 0.4577, G × T: 0.0032**               |
| <b>Elevated plus maze test</b>                |                                          |                                          |
|                                               | Entries into open arms (%)               | 0.0023**                                 |
|                                               | Time on open arms (%)                    | 0.0303*                                  |
| <b>Rotarod</b>                                |                                          |                                          |
|                                               | Latency to fall (sec)                    | G: 0.0703, G × Tr: 0.825                 |
| <b>Hot plate</b>                              |                                          |                                          |
|                                               | Latency (sec)                            | 0.6464                                   |
| <b>Social Interaction (Novel environment)</b> |                                          |                                          |
|                                               | Total duration of contact (sec)          | 0.0445*                                  |
|                                               | Number of contacts                       | 0.1277                                   |
|                                               | Mean duration / contact (sec)            | 0.5133                                   |
| <b>3 chamber social approach test</b>         |                                          |                                          |
| Sociability                                   | Time spent around stranger cage (%)      | 0.7741                                   |
| Preference                                    | Time spent around stranger cage (%)      | 0.0748                                   |
| <b>Prepulse inhibition test</b>               |                                          |                                          |
| Startle response                              | Startle amplitude to 110, 120 dB         | G: 0.0062, G × S: 0.0421*                |
| Prepulse inhibition                           | PPI (PPI 74, 78 dB - startle 110 dB) (%) | G: 0.1219, G × P: 0.8899                 |
|                                               | PPI (PPI 74, 78 dB - startle 120 dB) (%) | G: 0.0333*, G × P: 0.1127                |
| <b>Porsolt forced swim</b>                    |                                          |                                          |
|                                               | Immobility (%) Day1                      | G: 0.1147, G × T: 0.2675                 |
|                                               | Immobility (%) Day2                      | G: 0.1134, G × T: 0.0284*                |
| <b>T-maze test (spontaneous alteration)</b>   |                                          |                                          |
|                                               | Correct response (%)                     | G: 0.0256*, G × Tr: 0.3757               |
|                                               | Latency (sec)                            | G: 0.1612, G × Tr: 0.2337                |
| <b>Barnes maze test</b>                       |                                          |                                          |
| Acquisition                                   | Number of errors                         | G: 0.0003***, G × Tr: 0.0031**           |
|                                               | Distance traveled                        | G: 0.0094**, G × Tr: 0.0058**            |
|                                               | Latency                                  | G: 0.2051, G × Tr: 0.1263                |
|                                               | Omission errors                          | G: 0.375, G × Tr: 0.5279                 |
| Probe test (1 day)                            | Time spent around target hole (%)        | 0.0031**                                 |
| Probe test (1 month)                          | Time spent around target hole (%)        | 0.0254*                                  |
| <b>Fear conditioning</b>                      |                                          |                                          |
| Conditioning                                  | Freezing (%)                             | G: 0.1434, G × T: 0.883                  |
|                                               | Distance traveled                        | G: 0.0181*, G × T: 0.5153                |
| Context testing (1 day)                       | Freezing (%)                             | G: 0.0809, G × T: 0.8485                 |
|                                               | Distance traveled                        | G: 0.0195*, G × T: 0.8551                |
| Cued testing with altered context (1 day)     | Freezing during CS (%)                   | G: 0.4288, G × T: 0.8812                 |
|                                               | Distance traveled during CS              | G: 0.4428, G × T: 0.9637                 |
| Context testing (1 month)                     | Freezing (%)                             | G: 0.039*, G × T: 0.2822                 |
|                                               | Total distance traveled                  | G: 0.0182*, G × T: 0.1719                |
| Cued testing with altered context (1 month)   | Freezing during CS (%)                   | G: 0.1978, G × T: 0.9227                 |
|                                               | Distance traveled during CS              | G: 0.2095, G × T: 0.7771                 |
| <b>Tail suspension test</b>                   |                                          |                                          |
|                                               | Immobility (%)                           | G: 0.9557, G × T: 0.1154                 |
| <b>Home cage social interaction</b>           |                                          |                                          |
|                                               | Mean number of particles                 | G: 0.9939 (light: 0.925, dark: 0.8939)   |
|                                               | Activity level                           | G: 0.0516 (light: 0.2802, dark: 0.0215*) |

\*p < 0.05, \*\*p < 0.01, and \*\*\*p < 0.001 (n=20 in each group, one-way or two-way repeated measures ANOVA). In two-way repeated measures ANOVA, p-values of interaction of genotype (G) with time (T), trial (Tr), startle (S), or PPI (P) are shown.
